# Supplementary material for: Circular RNA NF1-419 enhances autophagy to ameliorate senile dementia by binding Dynamin-1 and Adaptor protein 2 B1 in AD-like mice
Source: publisher site journal article supplement (doi:10.18632/aging.102529), 2019-12-20
Supplement: Supplementary file 1 [file aging-v11i24-102529-supplementary-material-SD3.docx]

**Supplementary Table 1. Different expression of circRNAs in D-galactose induced senescent astrocyte (D2 vs. D0, *p* < 0.05 and more than 1.5 fold changes).**

| **circRNA_ID** | **Gene** | **Foldchange** | **PValue** | **FDR** | **D0** | **D2** |
| --- | --- | --- | --- | --- | --- | --- |
| chr2_57320683_57321619_+ | not_annotated | 309.8658 | 0.0001 | 0.1088 | 0.0000 | 0.7208 |
| chr3_148837814_148855356_+ | not_annotated | 251.9534 | 0.0004 | 0.1237 | 0.0000 | 0.5857 |
| chr12_40307165_40332371_- | not_annotated | 213.3452 | 0.0008 | 0.1237 | 0.0000 | 0.4956 |
| chr14_69800154_69851538_+ | not_annotated | 160.2589 | 0.0026 | 0.1237 | 0.0000 | 0.3717 |
| chr1_214562895_214581660_+ | Ap2a2 | 150.6069 | 0.0033 | 0.1237 | 0.0000 | 0.3491 |
| chr10_73574684_73593919_- | not_annotated | 150.6069 | 0.0033 | 0.1237 | 0.0000 | 0.3491 |
| chr6_38487243_38497244_+ | not_annotated | 150.6069 | 0.0033 | 0.1237 | 0.0000 | 0.3491 |
| chr10_64425984_64431795_- | Nxn | 145.7808 | 0.0037 | 0.1237 | 0.0000 | 0.3379 |
| chr7_109055032_109071915_- | Zfat | 145.7808 | 0.0037 | 0.1237 | 0.0000 | 0.3379 |
| chr1_21142145_21149467_+ | Akap7 | 126.4767 | 0.0061 | 0.1237 | 0.0000 | 0.2928 |
| chr3_55655527_55655836_+ | not_annotated | 126.4767 | 0.0061 | 0.1237 | 0.0000 | 0.2928 |
| chr5_128083027_128083901_+ | Zcchc11 | 126.4767 | 0.0061 | 0.1237 | 0.0000 | 0.2928 |
| chr1_219353460_219354165_+ | Pitpnm1 | 121.6507 | 0.0070 | 0.1237 | 0.0000 | 0.2816 |
| chr20_55285814_55286373_+ | Ascc3 | 121.6507 | 0.0070 | 0.1237 | 0.0000 | 0.2816 |
| chr4_131366412_131382968_- | Foxp1 | 116.8247 | 0.0080 | 0.1237 | 0.0000 | 0.2703 |
| chr5_90854404_90892934_+ | Kdm4c | 116.8247 | 0.0080 | 0.1237 | 0.0000 | 0.2703 |
| chr10_74780116_74786920_+ | not_annotated | 111.9986 | 0.0091 | 0.1237 | 0.0000 | 0.2590 |
| chr13_52563717_52563763_+ | Csrp1 | 111.9986 | 0.0091 | 0.1237 | 0.0000 | 0.2590 |
| chr15_48231960_48241781_- | not_annotated | 111.9986 | 0.0091 | 0.1237 | 0.0000 | 0.2590 |
| chr15_51936366_51954838_- | Ppp3cc | 111.9986 | 0.0091 | 0.1237 | 0.0000 | 0.2590 |
| chr2_209143856_209152642_- | Cept1 | 111.9986 | 0.0091 | 0.1237 | 0.0000 | 0.2590 |
| chr2_33950934_33964824_- | not_annotated | 111.9986 | 0.0091 | 0.1237 | 0.0000 | 0.2590 |
| chr4_8141791_8149019_+ | Srpk2 | 111.9986 | 0.0091 | 0.1237 | 0.0000 | 0.2590 |
| chr9_37910962_37923009_- | not_annotated | 111.9986 | 0.0091 | 0.1237 | 0.0000 | 0.2590 |
| chr10_70525504_70540046_+ | Ap2b1 | 107.1726 | 0.0104 | 0.1251 | 0.0000 | 0.2478 |
| chr16_9650675_9658531_- | Mapk8 | 107.1726 | 0.0104 | 0.1251 | 0.0000 | 0.2478 |
| chr19_34233020_34253181_+ | Arhgap10 | 107.1726 | 0.0104 | 0.1251 | 0.0000 | 0.2478 |
| chr19_54786578_54790907_+ | Banp | 107.1726 | 0.0104 | 0.1251 | 0.0000 | 0.2478 |
| chr14_79973875_79978835_- | Afap1 | 102.3466 | 0.0120 | 0.1417 | 0.0000 | 0.2365 |
| chr16_46423837_46453117_+ | Tenm3 | 102.3466 | 0.0120 | 0.1417 | 0.0000 | 0.2365 |
| chr19_54803498_54815443_+ | Banp | 102.3466 | 0.0120 | 0.1417 | 0.0000 | 0.2365 |
| chr2_187525295_187529234_+ | Mef2d | 102.3466 | 0.0120 | 0.1417 | 0.0000 | 0.2365 |
| chr3_91122599_91173631_- | RGD1309730 | 102.3466 | 0.0120 | 0.1417 | 0.0000 | 0.2365 |
| chr5_172559363_172563049_- | not_annotated | 102.3466 | 0.0120 | 0.1417 | 0.0000 | 0.2365 |
| chr6_100396828_100397255_+ | Fut8 | 102.3466 | 0.0120 | 0.1417 | 0.0000 | 0.2365 |
| chr13_51163205_51166706_- | Ppfia4 | 97.5206 | 0.0138 | 0.1595 | 0.0000 | 0.2253 |
| chr14_15086543_15112209_+ | Cnot6l | 97.5206 | 0.0138 | 0.1595 | 0.0000 | 0.2253 |
| chr14_7782502_7783047_- | Ptpn13 | 97.5206 | 0.0138 | 0.1595 | 0.0000 | 0.2253 |
| chr18_24551137_24551581_+ | Ammecr1l | 97.5206 | 0.0138 | 0.1595 | 0.0000 | 0.2253 |
| chr2_34373875_34517560_+ | not_annotated | 97.5206 | 0.0138 | 0.1595 | 0.0000 | 0.2253 |
| chr8_109192353_109216053_+ | Stag1 | 97.5206 | 0.0138 | 0.1595 | 0.0000 | 0.2253 |
| chr8_64635061_64648503_+ | Myo9a | 97.5206 | 0.0138 | 0.1595 | 0.0000 | 0.2253 |
| chr1_30711411_30718495_+ | Rspo3 | 92.6945 | 0.0160 | 0.1753 | 0.0000 | 0.2140 |
| chr10_67398229_67401836_- | Crlf3 | 92.6945 | 0.0160 | 0.1753 | 0.0000 | 0.2140 |
| chr11_16848640_16852898_+ | Cxadr | 92.6945 | 0.0160 | 0.1753 | 0.0000 | 0.2140 |
| chr12_24493013_24498590_- | Baz1b | 92.6945 | 0.0160 | 0.1753 | 0.0000 | 0.2140 |
| chr13_95098506_95128782_- | Akt3 | 92.6945 | 0.0160 | 0.1753 | 0.0000 | 0.2140 |
| chr17_18369555_18375993_+ | Nup153 | 92.6945 | 0.0160 | 0.1753 | 0.0000 | 0.2140 |
| chr17_599906_610676_+ | Npepo | 92.6945 | 0.0160 | 0.1753 | 0.0000 | 0.2140 |
| chr2_197906758_197913548_- | not_annotated | 92.6945 | 0.0160 | 0.1753 | 0.0000 | 0.2140 |
| chr2_22950023_22957449_+ | Homer1 | 92.6945 | 0.0160 | 0.1753 | 0.0000 | 0.2140 |
| chr3_112722217_112728973_- | Ttbk2 | 92.6945 | 0.0160 | 0.1753 | 0.0000 | 0.2140 |
| chr3_112885985_112899649_- | Ubr1 | 92.6945 | 0.0160 | 0.1753 | 0.0000 | 0.2140 |
| chr3_81909221_81910484_- | Prdm11 | 92.6945 | 0.0160 | 0.1753 | 0.0000 | 0.2140 |
| chr4_67299951_67301045_- | not_annotated | 92.6945 | 0.0160 | 0.1753 | 0.0000 | 0.2140 |
| chr5_127160496_127165240_+ | not_annotated | 92.6945 | 0.0160 | 0.1753 | 0.0000 | 0.2140 |
| chr5_81000430_81032096_+ | Pappa | 92.6945 | 0.0160 | 0.1753 | 0.0000 | 0.2140 |
| chr6_38617368_38641066_+ | not_annotated | 92.6945 | 0.0160 | 0.1753 | 0.0000 | 0.2140 |
| chr8_118066987_118085473_+ | Map4 | 92.6945 | 0.0160 | 0.1753 | 0.0000 | 0.2140 |
| chr1_13262070_13268495_+ | Reps1 | 87.8685 | 0.0185 | 0.1856 | 0.0000 | 0.2027 |
| chr1_146108193_146121004_- | not_annotated | 87.8685 | 0.0185 | 0.1856 | 0.0000 | 0.2027 |
| chr12_12721643_12722477_- | Pms2 | 87.8685 | 0.0185 | 0.1856 | 0.0000 | 0.2027 |
| chr14_79987348_79987917_- | Afap1 | 87.8685 | 0.0185 | 0.1856 | 0.0000 | 0.2027 |
| chr17_77658462_77665709_- | Frmd4a | 87.8685 | 0.0185 | 0.1856 | 0.0000 | 0.2027 |
| chr18_48505040_48521166_+ | not_annotated | 87.8685 | 0.0185 | 0.1856 | 0.0000 | 0.2027 |
| chr2_39028857_39042852_- | not_annotated | 87.8685 | 0.0185 | 0.1856 | 0.0000 | 0.2027 |
| chr4_115624887_115626399_+ | Zfp638 | 87.8685 | 0.0185 | 0.1856 | 0.0000 | 0.2027 |
| chr4_77219610_77235733_+ | Cul1 | 87.8685 | 0.0185 | 0.1856 | 0.0000 | 0.2027 |
| chr5_144292767_144294689_+ | Trappc3 | 87.8685 | 0.0185 | 0.1856 | 0.0000 | 0.2027 |
| chr7_50218839_50232687_- | Syt1 | 87.8685 | 0.0185 | 0.1856 | 0.0000 | 0.2027 |
| chrX_24915725_24919260_+ | not_annotated | 87.8685 | 0.0185 | 0.1856 | 0.0000 | 0.2027 |
| chr1_178944537_178955232_- | Rras2 | 83.0425 | 0.0215 | 0.2091 | 0.0000 | 0.1915 |
| chr1_206186518_206220473_- | not_annotated | 83.0425 | 0.0215 | 0.2091 | 0.0000 | 0.1915 |
| chr10_93438715_93451644_+ | Tlk2 | 83.0425 | 0.0215 | 0.2091 | 0.0000 | 0.1915 |
| chr11_31822239_31830066_+ | Son | 83.0425 | 0.0215 | 0.2091 | 0.0000 | 0.1915 |
| chr11_46926229_46930035_- | Senp7 | 83.0425 | 0.0215 | 0.2091 | 0.0000 | 0.1915 |
| chr14_20749845_20806363_- | Slc4a4 | 83.0425 | 0.0215 | 0.2091 | 0.0000 | 0.1915 |
| chr15_70790038_70792497_+ | Tdrd3 | 83.0425 | 0.0215 | 0.2091 | 0.0000 | 0.1915 |
| chr16_8396763_8421217_+ | Parg | 83.0425 | 0.0215 | 0.2091 | 0.0000 | 0.1915 |
| chr2_166406958_166423542_+ | Nmd3 | 83.0425 | 0.0215 | 0.2091 | 0.0000 | 0.1915 |
| chr3_54547246_54554495_- | Stk39 | 83.0425 | 0.0215 | 0.2091 | 0.0000 | 0.1915 |
| chr4_58420810_58500197_- | not_annotated | 83.0425 | 0.0215 | 0.2091 | 0.0000 | 0.1915 |
| chr5_13070551_13076754_- | Rb1cc1 | 83.0425 | 0.0215 | 0.2091 | 0.0000 | 0.1915 |
| chr6_75959532_75965681_- | RGD1304624 | 83.0425 | 0.0215 | 0.2091 | 0.0000 | 0.1915 |
| chr8_127980931_127991861_- | Oxsr1 | 83.0425 | 0.0215 | 0.2091 | 0.0000 | 0.1915 |
| chr9_113386175_113446886_- | Rab31 | 83.0425 | 0.0215 | 0.2091 | 0.0000 | 0.1915 |
| chr10_30169237_30185941_+ | Rnf145 | 78.2164 | 0.0250 | 0.2352 | 0.0000 | 0.1802 |
| chr11_71056741_71074618_- | not_annotated | 78.2164 | 0.0250 | 0.2352 | 0.0000 | 0.1802 |
| chr12_13862434_13863429_+ | Tnrc18 | 78.2164 | 0.0250 | 0.2352 | 0.0000 | 0.1802 |
| chr14_10869900_10877652_+ | Sec31a | 78.2164 | 0.0250 | 0.2352 | 0.0000 | 0.1802 |
| chr19_34233020_34272145_+ | Arhgap10 | 78.2164 | 0.0250 | 0.2352 | 0.0000 | 0.1802 |
| chr2_119233000_119247743_+ | Usp13 | 78.2164 | 0.0250 | 0.2352 | 0.0000 | 0.1802 |
| chr3_12306722_12330607_- | not_annotated | 78.2164 | 0.0250 | 0.2352 | 0.0000 | 0.1802 |
| chr4_62300390_62302914_+ | not_annotated | 78.2164 | 0.0250 | 0.2352 | 0.0000 | 0.1802 |
| chr6_22053425_22067568_- | Birc6 | 78.2164 | 0.0250 | 0.2352 | 0.0000 | 0.1802 |
| chr7_64953167_64961215_- | Irak3 | 78.2164 | 0.0250 | 0.2352 | 0.0000 | 0.1802 |
| chr1_102656457_102660697_- | not_annotated | 73.3904 | 0.0292 | 0.2641 | 0.0000 | 0.1689 |
| chr1_164931730_164953043_- | not_annotated | 73.3904 | 0.0292 | 0.2641 | 0.0000 | 0.1689 |
| chr1_221065774_221067559_- | Ehbp1l1 | 73.3904 | 0.0292 | 0.2641 | 0.0000 | 0.1689 |
| chr1_45923228_45983943_+ | not_annotated | 73.3904 | 0.0292 | 0.2641 | 0.0000 | 0.1689 |
| chr1_45983794_46014665_+ | not_annotated | 73.3904 | 0.0292 | 0.2641 | 0.0000 | 0.1689 |
| chr11_72210571_72229110_- | Dlg1 | 73.3904 | 0.0292 | 0.2641 | 0.0000 | 0.1689 |
| chr12_51937846_51945222_+ | Pus1 | 73.3904 | 0.0292 | 0.2641 | 0.0000 | 0.1689 |
| chr13_60462943_60484400_- | Cdc73 | 73.3904 | 0.0292 | 0.2641 | 0.0000 | 0.1689 |
| chr14_54840654_54869803_- | Pcdh7 | 73.3904 | 0.0292 | 0.2641 | 0.0000 | 0.1689 |
| chr18_24448523_24449151_+ | not_annotated | 73.3904 | 0.0292 | 0.2641 | 0.0000 | 0.1689 |
| chr2_113739689_113745181_+ | Pld1 | 73.3904 | 0.0292 | 0.2641 | 0.0000 | 0.1689 |
| chr20_27756689_27757153_- | Dse | 73.3904 | 0.0292 | 0.2641 | 0.0000 | 0.1689 |
| chr3_123031311_123032173_+ | Ptpra | 73.3904 | 0.0292 | 0.2641 | 0.0000 | 0.1689 |
| chr3_150696432_150725392_+ | Itch | 73.3904 | 0.0292 | 0.2641 | 0.0000 | 0.1689 |
| chr4_148048163_148052917_- | not_annotated | 73.3904 | 0.0292 | 0.2641 | 0.0000 | 0.1689 |
| chr4_25963495_25978767_+ | Cdk14 | 73.3904 | 0.0292 | 0.2641 | 0.0000 | 0.1689 |
| chr5_80973382_80985660_+ | Pappa | 73.3904 | 0.0292 | 0.2641 | 0.0000 | 0.1689 |
| chr7_50173693_50278844_- | Syt1 | 73.3904 | 0.0292 | 0.2641 | 0.0000 | 0.1689 |
| chr8_21663861_21664122_+ | Ubl5 | 73.3904 | 0.0292 | 0.2641 | 0.0000 | 0.1689 |
| chr8_70524346_70542478_+ | Dpp8 | 73.3904 | 0.0292 | 0.2641 | 0.0000 | 0.1689 |
| chr9_42780403_42791956_- | Uggt1 | 73.3904 | 0.0292 | 0.2641 | 0.0000 | 0.1689 |
| chr1_163938955_163976846_- | Uvrag | 68.5644 | 0.0343 | 0.2888 | 0.0000 | 0.1577 |
| chr1_164025518_164055455_- | Uvrag | 68.5644 | 0.0343 | 0.2888 | 0.0000 | 0.1577 |
| chr1_216737401_216742438_- | Nap1l4 | 68.5644 | 0.0343 | 0.2888 | 0.0000 | 0.1577 |
| chr1_239293164_239299795_+ | Abhd17b | 68.5644 | 0.0343 | 0.2888 | 0.0000 | 0.1577 |
| chr1_257488392_257491755_- | Noc3l | 68.5644 | 0.0343 | 0.2888 | 0.0000 | 0.1577 |
| chr10_110157631_110164041_- | Csnk1d | 68.5644 | 0.0343 | 0.2888 | 0.0000 | 0.1577 |
| chr10_86175962_86184480_+ | Cdk12 | 68.5644 | 0.0343 | 0.2888 | 0.0000 | 0.1577 |
| chr13_86432220_86451001_- | Pbx1 | 68.5644 | 0.0343 | 0.2888 | 0.0000 | 0.1577 |
| chr14_16345395_16358572_+ | Ccni | 68.5644 | 0.0343 | 0.2888 | 0.0000 | 0.1577 |
| chr16_27503252_27517477_+ | Tll1 | 68.5644 | 0.0343 | 0.2888 | 0.0000 | 0.1577 |
| chr18_69642130_69657373_- | Smad4 | 68.5644 | 0.0343 | 0.2888 | 0.0000 | 0.1577 |
| chr19_34292209_34305849_+ | Arhgap10 | 68.5644 | 0.0343 | 0.2888 | 0.0000 | 0.1577 |
| chr2_189364002_189369293_- | Atp8b2 | 68.5644 | 0.0343 | 0.2888 | 0.0000 | 0.1577 |
| chr2_218896348_218929338_- | Slc30a7 | 68.5644 | 0.0343 | 0.2888 | 0.0000 | 0.1577 |
| chr3_160392920_160396721_+ | Ywhab | 68.5644 | 0.0343 | 0.2888 | 0.0000 | 0.1577 |
| chr3_56172538_56181510_+ | not_annotated | 68.5644 | 0.0343 | 0.2888 | 0.0000 | 0.1577 |
| chr3_64072520_64095111_- | Sestd1 | 68.5644 | 0.0343 | 0.2888 | 0.0000 | 0.1577 |
| chr4_127663314_127673795_- | Suclg2 | 68.5644 | 0.0343 | 0.2888 | 0.0000 | 0.1577 |
| chr4_152265847_152298116_- | Erc1 | 68.5644 | 0.0343 | 0.2888 | 0.0000 | 0.1577 |
| chr4_170518672_170526305_+ | not_annotated | 68.5644 | 0.0343 | 0.2888 | 0.0000 | 0.1577 |
| chr4_58469325_58500197_- | not_annotated | 68.5644 | 0.0343 | 0.2888 | 0.0000 | 0.1577 |
| chr4_6219912_6230020_+ | not_annotated | 68.5644 | 0.0343 | 0.2888 | 0.0000 | 0.1577 |
| chr5_148050939_148057784_+ | Ptp4a2 | 68.5644 | 0.0343 | 0.2888 | 0.0000 | 0.1577 |
| chr5_157690578_157712883_+ | Capzb | 68.5644 | 0.0343 | 0.2888 | 0.0000 | 0.1577 |
| chr5_76699783_76728269_- | Ptbp3 | 68.5644 | 0.0343 | 0.2888 | 0.0000 | 0.1577 |
| chr5_90818736_90827570_+ | Kdm4c | 68.5644 | 0.0343 | 0.2888 | 0.0000 | 0.1577 |
| chr6_123404372_123405248_- | Foxn3 | 68.5644 | 0.0343 | 0.2888 | 0.0000 | 0.1577 |
| chr6_22044898_22067568_- | Birc6 | 68.5644 | 0.0343 | 0.2888 | 0.0000 | 0.1577 |
| chr7_31849489_31858804_- | Tmpo | 68.5644 | 0.0343 | 0.2888 | 0.0000 | 0.1577 |
| chr8_128807474_128808790_+ | Rpsa | 68.5644 | 0.0343 | 0.2888 | 0.0000 | 0.1577 |
| chr8_759958_776054_+ | Gucy1a2 | 68.5644 | 0.0343 | 0.2888 | 0.0000 | 0.1577 |
| chr8_76903859_76904745_- | Rnf111 | 68.5644 | 0.0343 | 0.2888 | 0.0000 | 0.1577 |
| chr9_66885432_66889912_+ | Carf | 68.5644 | 0.0343 | 0.2888 | 0.0000 | 0.1577 |
| chr9_81734340_81749099_- | not_annotated | 68.5644 | 0.0343 | 0.2888 | 0.0000 | 0.1577 |
| chrX_62537349_62570599_- | Pola1 | 68.5644 | 0.0343 | 0.2888 | 0.0000 | 0.1577 |
| chr1_189560181_189595749_+ | Exnef | 63.7384 | 0.0405 | 0.3224 | 0.0000 | 0.1464 |
| chr1_21142145_21211619_+ | Akap7 | 63.7384 | 0.0405 | 0.3224 | 0.0000 | 0.1464 |
| chr1_221308010_221311604_- | Pola2 | 63.7384 | 0.0405 | 0.3224 | 0.0000 | 0.1464 |
| chr10_52228530_52270583_- | Map2k4 | 63.7384 | 0.0405 | 0.3224 | 0.0000 | 0.1464 |
| chr10_59279375_59281717_+ | Ankfy1 | 63.7384 | 0.0405 | 0.3224 | 0.0000 | 0.1464 |
| chr10_95029081_95044344_- | Smurf2 | 63.7384 | 0.0405 | 0.3224 | 0.0000 | 0.1464 |
| chr11_47165426_47169764_+ | Cep97 | 63.7384 | 0.0405 | 0.3224 | 0.0000 | 0.1464 |
| chr12_13600118_13612054_+ | Rnf216 | 63.7384 | 0.0405 | 0.3224 | 0.0000 | 0.1464 |
| chr12_6934423_6944194_- | Uspl1 | 63.7384 | 0.0405 | 0.3224 | 0.0000 | 0.1464 |
| chr13_95120752_95196402_- | Akt3 | 63.7384 | 0.0405 | 0.3224 | 0.0000 | 0.1464 |
| chr14_20553224_20559770_- | Slc4a4 | 63.7384 | 0.0405 | 0.3224 | 0.0000 | 0.1464 |
| chr14_2679717_2680685_- | Mtf2 | 63.7384 | 0.0405 | 0.3224 | 0.0000 | 0.1464 |
| chr15_23840157_23848858_+ | Samd4a | 63.7384 | 0.0405 | 0.3224 | 0.0000 | 0.1464 |
| chr15_4392150_4396767_- | Fam149b1 | 63.7384 | 0.0405 | 0.3224 | 0.0000 | 0.1464 |
| chr15_54430708_54444565_- | Fndc3a | 63.7384 | 0.0405 | 0.3224 | 0.0000 | 0.1464 |
| chr16_80662286_80665957_+ | Erich1 | 63.7384 | 0.0405 | 0.3224 | 0.0000 | 0.1464 |
| chr19_34249087_34312530_+ | Arhgap10 | 63.7384 | 0.0405 | 0.3224 | 0.0000 | 0.1464 |
| chr19_34346074_34372833_+ | Arhgap10 | 63.7384 | 0.0405 | 0.3224 | 0.0000 | 0.1464 |
| chr2_34373875_34503654_+ | not_annotated | 63.7384 | 0.0405 | 0.3224 | 0.0000 | 0.1464 |
| chr3_119296641_119302965_- | Trpm7 | 63.7384 | 0.0405 | 0.3224 | 0.0000 | 0.1464 |
| chr3_133012095_133016541_- | Tasp1 | 63.7384 | 0.0405 | 0.3224 | 0.0000 | 0.1464 |
| chr3_149844190_149866492_- | Cdk5rap1 | 63.7384 | 0.0405 | 0.3224 | 0.0000 | 0.1464 |
| chr3_21721366_21736929_+ | Rabgap1 | 63.7384 | 0.0405 | 0.3224 | 0.0000 | 0.1464 |
| chr3_21894168_21904269_- | Strbp | 63.7384 | 0.0405 | 0.3224 | 0.0000 | 0.1464 |
| chr4_19289720_19349870_- | Sema3d | 63.7384 | 0.0405 | 0.3224 | 0.0000 | 0.1464 |
| chr5_102528780_102689769_- | Bnc2 | 63.7384 | 0.0405 | 0.3224 | 0.0000 | 0.1464 |
| chr5_102552742_102689769_- | Bnc2 | 63.7384 | 0.0405 | 0.3224 | 0.0000 | 0.1464 |
| chr5_28049976_28063547_- | Slc26a7 | 63.7384 | 0.0405 | 0.3224 | 0.0000 | 0.1464 |
| chr5_92902514_92962848_- | not_annotated | 63.7384 | 0.0405 | 0.3224 | 0.0000 | 0.1464 |
| chr6_108248261_108249918_+ | not_annotated | 63.7384 | 0.0405 | 0.3224 | 0.0000 | 0.1464 |
| chr6_129621583_129660096_+ | Papola | 63.7384 | 0.0405 | 0.3224 | 0.0000 | 0.1464 |
| chr6_22362488_22399107_+ | Memo1 | 63.7384 | 0.0405 | 0.3224 | 0.0000 | 0.1464 |
| chr6_80306621_80307306_- | Fbxo33 | 63.7384 | 0.0405 | 0.3224 | 0.0000 | 0.1464 |
| chr8_78521649_78538216_- | Tcf12 | 63.7384 | 0.0405 | 0.3224 | 0.0000 | 0.1464 |
| chr9_111630473_111632154_+ | not_annotated | 63.7384 | 0.0405 | 0.3224 | 0.0000 | 0.1464 |
| chr9_51400307_51412180_+ | Gulp1 | 63.7384 | 0.0405 | 0.3224 | 0.0000 | 0.1464 |
| chr1_144463965_144495637_+ | Adamtsl3 | 58.9123 | 0.0479 | 0.3457 | 0.0000 | 0.1352 |
| chr1_192089780_192095234_+ | Dctn5 | 58.9123 | 0.0479 | 0.3457 | 0.0000 | 0.1352 |
| chr1_200606971_200615170_- | Fgfr2 | 58.9123 | 0.0479 | 0.3457 | 0.0000 | 0.1352 |
| chr1_80828696_80831295_- | PVR | 58.9123 | 0.0479 | 0.3457 | 0.0000 | 0.1352 |
| chr1_89972723_89975077_- | not_annotated | 58.9123 | 0.0479 | 0.3457 | 0.0000 | 0.1352 |
| chr13_35658619_35669017_- | Epb4.1l5 | 58.9123 | 0.0479 | 0.3457 | 0.0000 | 0.1352 |
| chr13_77048275_77051919_+ | Rfwd2 | 58.9123 | 0.0479 | 0.3457 | 0.0000 | 0.1352 |
| chr13_83634263_83660292_- | Dcaf6 | 58.9123 | 0.0479 | 0.3457 | 0.0000 | 0.1352 |
| chr13_90533362_90564123_+ | Dcaf8 | 58.9123 | 0.0479 | 0.3457 | 0.0000 | 0.1352 |
| chr14_20749845_20806514_- | Slc4a4 | 58.9123 | 0.0479 | 0.3457 | 0.0000 | 0.1352 |
| chr14_7258926_7265066_- | Aff1 | 58.9123 | 0.0479 | 0.3457 | 0.0000 | 0.1352 |
| chr14_81301797_81329508_- | Grk4 | 58.9123 | 0.0479 | 0.3457 | 0.0000 | 0.1352 |
| chr16_46262257_46453117_+ | Tenm3 | 58.9123 | 0.0479 | 0.3457 | 0.0000 | 0.1352 |
| chr17_19160994_19225009_+ | Atxn1 | 58.9123 | 0.0479 | 0.3457 | 0.0000 | 0.1352 |
| chr17_63265406_63292101_+ | Larp4b | 58.9123 | 0.0479 | 0.3457 | 0.0000 | 0.1352 |
| chr18_51623122_51624243_- | Aldh7a1 | 58.9123 | 0.0479 | 0.3457 | 0.0000 | 0.1352 |
| chr18_81170024_81289889_- | not_annotated | 58.9123 | 0.0479 | 0.3457 | 0.0000 | 0.1352 |
| chr19_34310750_34346224_+ | Arhgap10 | 58.9123 | 0.0479 | 0.3457 | 0.0000 | 0.1352 |
| chr19_43119868_43124021_- | Pdpr | 58.9123 | 0.0479 | 0.3457 | 0.0000 | 0.1352 |
| chr19_55728917_55795237_- | not_annotated | 58.9123 | 0.0479 | 0.3457 | 0.0000 | 0.1352 |
| chr2_178368596_178375441_- | Etfdh | 58.9123 | 0.0479 | 0.3457 | 0.0000 | 0.1352 |
| chr2_221062375_221078819_- | Snx7 | 58.9123 | 0.0479 | 0.3457 | 0.0000 | 0.1352 |
| chr2_22946430_22964734_+ | Homer1 | 58.9123 | 0.0479 | 0.3457 | 0.0000 | 0.1352 |
| chr2_231078900_231128709_+ | Camk2d | 58.9123 | 0.0479 | 0.3457 | 0.0000 | 0.1352 |
| chr3_13919475_13925763_- | Psmd5 | 58.9123 | 0.0479 | 0.3457 | 0.0000 | 0.1352 |
| chr3_157028112_157040380_- | Chd6 | 58.9123 | 0.0479 | 0.3457 | 0.0000 | 0.1352 |
| chr3_171861693_171866264_+ | Vapb | 58.9123 | 0.0479 | 0.3457 | 0.0000 | 0.1352 |
| chr3_67773497_67787987_- | Nckap1 | 58.9123 | 0.0479 | 0.3457 | 0.0000 | 0.1352 |
| chr5_139379737_139401879_+ | Scmh1 | 58.9123 | 0.0479 | 0.3457 | 0.0000 | 0.1352 |
| chr5_154211165_154213194_+ | Srsf10 | 58.9123 | 0.0479 | 0.3457 | 0.0000 | 0.1352 |
| chr5_159691388_159702524_+ | Fbxo42 | 58.9123 | 0.0479 | 0.3457 | 0.0000 | 0.1352 |
| chr5_43607057_43661144_+ | Epha7 | 58.9123 | 0.0479 | 0.3457 | 0.0000 | 0.1352 |
| chr5_60992103_60994327_- | not_annotated | 58.9123 | 0.0479 | 0.3457 | 0.0000 | 0.1352 |
| chr5_64346707_64388248_+ | Tmeff1 | 58.9123 | 0.0479 | 0.3457 | 0.0000 | 0.1352 |
| chr5_71790897_71792149_+ | not_annotated | 58.9123 | 0.0479 | 0.3457 | 0.0000 | 0.1352 |
| chr5_72130035_72136205_+ | Rad23b | 58.9123 | 0.0479 | 0.3457 | 0.0000 | 0.1352 |
| chr5_90815777_90827570_+ | Kdm4c | 58.9123 | 0.0479 | 0.3457 | 0.0000 | 0.1352 |
| chr6_104466414_104475259_+ | not_annotated | 58.9123 | 0.0479 | 0.3457 | 0.0000 | 0.1352 |
| chr6_86729142_86748180_+ | not_annotated | 58.9123 | 0.0479 | 0.3457 | 0.0000 | 0.1352 |
| chr7_114363234_114377276_- | Ago2 | 58.9123 | 0.0479 | 0.3457 | 0.0000 | 0.1352 |
| chr7_114550936_114573932_- | Ptk2 | 58.9123 | 0.0479 | 0.3457 | 0.0000 | 0.1352 |
| chr7_114550936_114611317_- | Ptk2 | 58.9123 | 0.0479 | 0.3457 | 0.0000 | 0.1352 |
| chr7_41167312_41178782_+ | Atp2b1 | 58.9123 | 0.0479 | 0.3457 | 0.0000 | 0.1352 |
| chr7_90276501_90277429_- | Trps1 | 58.9123 | 0.0479 | 0.3457 | 0.0000 | 0.1352 |
| chr8_109243253_109288160_+ | Stag1 | 58.9123 | 0.0479 | 0.3457 | 0.0000 | 0.1352 |
| chr8_109302672_109306182_+ | not_annotated | 58.9123 | 0.0479 | 0.3457 | 0.0000 | 0.1352 |
| chr8_26518227_26519927_+ | not_annotated | 58.9123 | 0.0479 | 0.3457 | 0.0000 | 0.1352 |
| chr8_60059164_60076960_- | Etfa | 58.9123 | 0.0479 | 0.3457 | 0.0000 | 0.1352 |
| chr8_64610881_64623043_+ | Myo9a | 58.9123 | 0.0479 | 0.3457 | 0.0000 | 0.1352 |
| chr9_73752937_73773659_- | not_annotated | 58.9123 | 0.0479 | 0.3457 | 0.0000 | 0.1352 |
| chrX_112033981_112034696_+ | Mid2 | 58.9123 | 0.0479 | 0.3457 | 0.0000 | 0.1352 |
| chrX_128550177_128558306_+ | Stag2 | 58.9123 | 0.0479 | 0.3457 | 0.0000 | 0.1352 |
| chrX_52581092_52617512_+ | not_annotated | 58.9123 | 0.0479 | 0.3457 | 0.0000 | 0.1352 |
| chr14_20749845_20769564_- | Slc4a4 | 18.2601 | 0.0003 | 0.1237 | 0.1702 | 1.0362 |
| chr2_38096882_38110573_- | not_annotated | 12.9132 | 0.0020 | 0.1237 | 0.1702 | 0.7321 |
| chr4_133073964_133094100_- | Shq1 | 11.9230 | 0.0029 | 0.1237 | 0.1702 | 0.6758 |
| chr5_167486001_167558250_+ | Rere | 11.3289 | 0.0038 | 0.1237 | 0.1702 | 0.6420 |
| chr7_132681520_132700523_- | Slc2a13 | 10.9329 | 0.0044 | 0.1237 | 0.1702 | 0.6194 |
| chr18_77466020_77520779_- | Atp9b | 9.5466 | 0.0080 | 0.1237 | 0.1702 | 0.5406 |
| chr6_144189453_144275272_+ | not_annotated | 8.5126 | 0.0025 | 0.1237 | 0.3404 | 0.9461 |
| chr20_27756685_27757153_- | Dse | 7.9624 | 0.0167 | 0.1827 | 0.1702 | 0.4505 |
| chr7_76801989_76809117_- | not_annotated | 7.9624 | 0.0167 | 0.1827 | 0.1702 | 0.4505 |
| chr18_5191058_5194413_- | Zfp521 | 7.7643 | 0.0184 | 0.1856 | 0.1702 | 0.4392 |
| chr6_132068857_132075882_- | not_annotated | 7.7643 | 0.0184 | 0.1856 | 0.1702 | 0.4392 |
| chr5_12156802_12172003_- | Pcmtd1 | 7.5663 | 0.0203 | 0.2022 | 0.1702 | 0.4280 |
| chr1_265396240_265401005_- | Fbxw4 | 7.3683 | 0.0223 | 0.2156 | 0.1702 | 0.4167 |
| chr14_14181436_14192047_- | not_annotated | 7.3683 | 0.0223 | 0.2156 | 0.1702 | 0.4167 |
| chr3_122318077_122318825_+ | Stk35 | 7.3683 | 0.0223 | 0.2156 | 0.1702 | 0.4167 |
| chr9_73766839_73773659_- | not_annotated | 7.1702 | 0.0246 | 0.2352 | 0.1702 | 0.4055 |
| chr13_95003382_95013012_+ | Sdccag8 | 6.9722 | 0.0272 | 0.2541 | 0.1702 | 0.3942 |
| chr1_274700623_274718538_+ | Shoc2 | 6.7742 | 0.0301 | 0.2705 | 0.1702 | 0.3829 |
| chr20_13906484_13921285_+ | Cabin1 | 6.7742 | 0.0301 | 0.2705 | 0.1702 | 0.3829 |
| chr6_3116549_3130068_- | Sos1 | 6.7742 | 0.0301 | 0.2705 | 0.1702 | 0.3829 |
| chr2_39021037_39042852_- | not_annotated | 6.5972 | 0.0038 | 0.1237 | 0.5105 | 1.0925 |
| chr18_59190041_59209831_+ | Wdr7 | 6.5761 | 0.0333 | 0.2888 | 0.1702 | 0.3717 |
| chr2_39042496_39042852_- | not_annotated | 6.5761 | 0.0333 | 0.2888 | 0.1702 | 0.3717 |
| chrX_4876505_4898806_- | not_annotated | 6.5761 | 0.0333 | 0.2888 | 0.1702 | 0.3717 |
| chr19_9973288_10006609_+ | Csnk2a2 | 6.3781 | 0.0369 | 0.3081 | 0.1702 | 0.3604 |
| chr5_167486001_167615430_+ | Rere | 6.3781 | 0.0369 | 0.3081 | 0.1702 | 0.3604 |
| chr5_76692539_76728269_- | Ptbp3 | 6.3781 | 0.0369 | 0.3081 | 0.1702 | 0.3604 |
| chr18_28042792_28048198_+ | Ctnna1 | 6.2886 | 0.0110 | 0.1312 | 0.3404 | 0.6983 |
| chr7_129696842_129708614_- | Brd1 | 6.1900 | 0.0053 | 0.1237 | 0.5105 | 1.0249 |
| chr10_73980841_73985026_- | Vmp1 | 6.1801 | 0.0409 | 0.3246 | 0.1702 | 0.3491 |
| chr4_49207203_49287862_+ | not_annotated | 6.1801 | 0.0409 | 0.3246 | 0.1702 | 0.3491 |
| chr5_144931944_144932532_- | Zmym4 | 6.1801 | 0.0409 | 0.3246 | 0.1702 | 0.3491 |
| chr18_81170024_81208554_- | not_annotated | 5.9820 | 0.0455 | 0.3457 | 0.1702 | 0.3379 |
| chr5_148546311_148556027_- | Zcchc17 | 5.9820 | 0.0455 | 0.3457 | 0.1702 | 0.3379 |
| chr1_204960841_204961691_+ | not_annotated | 5.9464 | 0.0024 | 0.1237 | 0.8509 | 1.6331 |
| chr2_33933956_33955969_- | not_annotated | 5.7827 | 0.0043 | 0.1237 | 0.6807 | 1.2727 |
| chr1_163203870_163216364_- | not_annotated | 5.3787 | 0.0214 | 0.2091 | 0.3404 | 0.5969 |
| chr1_246784973_246785456_- | not_annotated | 5.2777 | 0.0231 | 0.2223 | 0.3404 | 0.5857 |
| chr17_76250434_76265943_- | Upf2 | 5.1766 | 0.0250 | 0.2352 | 0.3404 | 0.5744 |
| chr15_23840157_23853169_+ | Samd4a | 4.9744 | 0.0292 | 0.2641 | 0.3404 | 0.5519 |
| chr3_80718406_80732927_+ | Ambra1 | 4.9744 | 0.0292 | 0.2641 | 0.3404 | 0.5519 |
| chr5_160066006_160070914_- | LOC690911 | 4.9005 | 0.0162 | 0.1778 | 0.5105 | 0.8109 |
| chr3_423701_431925_- | Spopl | 4.6711 | 0.0371 | 0.3090 | 0.3404 | 0.5181 |
| chr4_50180977_50200342_- | Aass | 4.6682 | 0.0055 | 0.1237 | 1.1912 | 1.7908 |
| chr15_70098761_70139170_- | Diaph3 | 4.6291 | 0.0209 | 0.2080 | 0.5105 | 0.7659 |
| chr5_167486001_167526275_+ | Rere | 4.6078 | 0.0137 | 0.1595 | 0.6807 | 1.0136 |
| chr6_871525_872927_+ | Crim1 | 4.5567 | 0.0144 | 0.1664 | 0.6807 | 1.0024 |
| chr12_30082881_30083826_- | Tpst1 | 4.4689 | 0.0436 | 0.3412 | 0.3404 | 0.4956 |
| chr3_113846735_113862070_+ | Casc4 | 4.4689 | 0.0436 | 0.3412 | 0.3404 | 0.4956 |
| chr3_33003598_33006797_+ | Acvr2a | 4.4689 | 0.0436 | 0.3412 | 0.3404 | 0.4956 |
| chrX_63177769_63182385_- | Zfx | 4.4122 | 0.0055 | 0.1237 | 1.5316 | 2.1737 |
| chr10_16724062_16730140_- | Crebrf | 4.4035 | 0.0170 | 0.1851 | 0.6807 | 0.9686 |
| chr2_22950023_23000600_+ | Homer1 | 4.3678 | 0.0474 | 0.3457 | 0.3404 | 0.4843 |
| chr12_51582921_51584301_- | not_annotated | 4.3576 | 0.0270 | 0.2529 | 0.5105 | 0.7208 |
| chr16_40469880_40483041_- | Vegfc | 4.2219 | 0.0308 | 0.2765 | 0.5105 | 0.6983 |
| chr1_200648164_200671090_- | Fgfr2 | 4.1540 | 0.0329 | 0.2888 | 0.5105 | 0.6870 |
| chr11_24547990_24550752_- | App | 4.1481 | 0.0223 | 0.2156 | 0.6807 | 0.9123 |
| chr19_34292209_34346224_+ | Arhgap10 | 4.1481 | 0.0223 | 0.2156 | 0.6807 | 0.9123 |
| chr20_8006289_8019015_- | Fkbp5 | 4.0861 | 0.0352 | 0.2950 | 0.5105 | 0.6758 |
| chr5_43659900_43661144_+ | Epha7 | 4.0147 | 0.0045 | 0.1237 | 3.2333 | 4.1672 |
| chr9_112406660_112412113_+ | Man2a1 | 3.8988 | 0.0221 | 0.2146 | 0.8509 | 1.0699 |
| chr5_76925720_76926914_+ | not_annotated | 3.8825 | 0.0430 | 0.3376 | 0.5105 | 0.6420 |
| chrX_139736501_139737195_- | Gpc3 | 3.8825 | 0.0430 | 0.3376 | 0.5105 | 0.6420 |
| chr1_165646261_165654319_+ | Rab6a | 3.7652 | 0.0066 | 0.1237 | 3.2333 | 3.9081 |
| chr8_94725468_94730732_+ | Cyb5r4 | 3.7468 | 0.0493 | 0.3483 | 0.5105 | 0.6194 |
| chr10_95327724_95328546_- | not_annotated | 3.7350 | 0.0269 | 0.2519 | 0.8509 | 1.0249 |
| chr17_81177595_81187710_- | Hacd1 | 3.6650 | 0.0070 | 0.1237 | 3.7439 | 4.4037 |
| chr13_26277463_26280241_+ | Phlpp1 | 3.4074 | 0.0282 | 0.2633 | 1.1912 | 1.3065 |
| chrX_63177769_63195572_- | Zfx | 3.3599 | 0.0172 | 0.1851 | 2.2123 | 2.3877 |
| chr16_26755422_26780008_+ | not_annotated | 3.3432 | 0.0271 | 0.2533 | 1.3614 | 1.4641 |
| chr11_3142305_3142832_+ | not_annotated | 3.3220 | 0.0371 | 0.3090 | 1.0211 | 1.0925 |
| chr4_168514863_168517342_- | Dusp16 | 3.1384 | 0.0196 | 0.1961 | 3.0632 | 3.0860 |
| chr17_81173780_81187710_- | Hacd1 | 3.1244 | 0.0266 | 0.2499 | 2.0421 | 2.0498 |
| chr8_127971477_127991861_- | Oxsr1 | 3.0648 | 0.0368 | 0.3081 | 1.5316 | 1.5092 |
| chr14_69800154_69819258_+ | not_annotated | 3.0069 | 0.0202 | 0.2019 | 4.4246 | 4.2685 |
| chr17_63849305_63879166_- | Zmynd11 | 2.9559 | 0.0247 | 0.2352 | 3.5737 | 3.3901 |
| chr11_89108654_89110961_- | Spidr | 2.9025 | 0.0406 | 0.3232 | 1.8719 | 1.7457 |
| chr3_94396940_94398038_- | Hipk3 | 2.6806 | 0.0247 | 0.2352 | 29.4404 | 25.2959 |
| chr8_54584699_54584881_- | not_annotated | -2.8143 | 0.0424 | 0.3332 | 3.5737 | 0.4055 |
| chr13_110049191_110052621_- | Ppp2r5a | -2.8898 | 0.0493 | 0.3483 | 2.5526 | 0.2816 |
| chr17_36610259_36627167_+ | not_annotated | -3.2065 | 0.0346 | 0.2904 | 2.3825 | 0.2365 |
| chr18_13352206_13404495_+ | not_annotated | -3.3185 | 0.0092 | 0.1237 | 11.9123 | 1.1488 |
| chr9_20811699_20817197_+ | Cd2ap | -3.3891 | 0.0329 | 0.2888 | 2.0421 | 0.1915 |
| chr10_110680099_110690679_+ | Tbcd | -3.423 | 0.0394 | 0.3224 | 1.7018 | 0.1577 |
| chr1_174609600_174613577_- | Tmem41b | -3.4752 | 0.0494 | 0.3488 | 1.3614 | 0.1239 |
| chr3_2030744_2032401_- | Ehmt1 | -3.6049 | 0.0196 | 0.1961 | 2.5526 | 0.2253 |
| chr14_92417430_92474733_- | Cobl | -3.7041 | 0.0483 | 0.3457 | 1.1912 | 0.1014 |
| chr5_106109624_106121498_- | Mllt3 | -3.7041 | 0.0483 | 0.3457 | 1.1912 | 0.1014 |
| chr3_104816866_104818862_+ | not_annotated | -3.9072 | 0.0284 | 0.2641 | 1.5316 | 0.1239 |
| chr12_24513410_24524704_- | Baz1b | -4.0601 | 0.0461 | 0.3457 | 1.0211 | 0.0788 |
| chr3_148837814_148842440_+ | not_annotated | -4.0601 | 0.0461 | 0.3457 | 1.0211 | 0.0788 |
| chr1_185306404_185307538_+ | Pik3c2a | -4.1275 | 0.0058 | 0.1237 | 4.0842 | 0.3154 |
| chr3_91713775_91725977_- | not_annotated | -4.1554 | 0.0340 | 0.2888 | 1.1912 | 0.0901 |
| chr7_73834044_73848871_- | Stk3 | -4.3908 | 0.0050 | 0.1237 | 3.5737 | 0.2590 |
| chr1_255942367_255958835_- | Ide | -4.6896 | 0.0420 | 0.3305 | 0.8509 | 0.0563 |
| chr11_79763901_79778947_- | not_annotated | -4.6896 | 0.0420 | 0.3305 | 0.8509 | 0.0563 |
| chr17_36113611_36121325_- | Mboat1 | -4.6896 | 0.0420 | 0.3305 | 0.8509 | 0.0563 |
| chr2_34574151_34576926_+ | not_annotated | -4.6896 | 0.0420 | 0.3305 | 0.8509 | 0.0563 |
| chr4_5722369_5724008_- | not_annotated | -4.6896 | 0.0420 | 0.3305 | 0.8509 | 0.0563 |
| chr5_62114349_62121690_+ | Nans | -4.6896 | 0.0420 | 0.3305 | 0.8509 | 0.0563 |
| chr3_47474984_47491882_+ | Tank | -4.732 | 0.0227 | 0.2189 | 1.1912 | 0.0788 |
| chr6_132383344_132391018_+ | Eml1 | -4.732 | 0.0227 | 0.2189 | 1.1912 | 0.0788 |
| chr8_439822_456940_+ | Gucy1a2 | -4.7454 | 0.0176 | 0.1851 | 1.3614 | 0.0901 |
| chr1_249224694_249230036_- | Prkg1 | -5.6195 | 0.0184 | 0.1856 | 1.0211 | 0.0563 |
| chr13_25740800_25748576_+ | RGD1307235 | -5.8042 | 0.0245 | 0.2351 | 0.8509 | 0.0451 |
| chr9_69854064_69868399_- | Ino80d | -5.8042 | 0.0245 | 0.2351 | 0.8509 | 0.0451 |
| chr5_166066342_166067876_- | Kif1b | -6.0758 | 0.0058 | 0.1237 | 1.5316 | 0.0788 |
| chr1_175714102_175714982_- | Mrvi1 | -6.1041 | 0.0339 | 0.2888 | 0.6807 | 0.0338 |
| chr1_259479327_259488326_- | not_annotated | -6.1041 | 0.0339 | 0.2888 | 0.6807 | 0.0338 |
| chr1_266201079_266206952_+ | Sufu | -6.1041 | 0.0339 | 0.2888 | 0.6807 | 0.0338 |
| chr13_99143758_99146830_+ | Sde2 | -6.1041 | 0.0339 | 0.2888 | 0.6807 | 0.0338 |
| chr18_15347145_15352616_+ | Trappc8 | -6.1041 | 0.0339 | 0.2888 | 0.6807 | 0.0338 |
| chr18_44477275_44483422_+ | not_annotated | -6.1041 | 0.0339 | 0.2888 | 0.6807 | 0.0338 |
| chr18_6026794_6051719_- | Ss18 | -6.1041 | 0.0339 | 0.2888 | 0.6807 | 0.0338 |
| chr7_114523676_114540933_- | Ptk2 | -6.1041 | 0.0339 | 0.2888 | 0.6807 | 0.0338 |
| chr7_18533478_18535599_- | Hnrnpm | -6.1041 | 0.0339 | 0.2888 | 0.6807 | 0.0338 |
| chr7_72802496_72804218_+ | Mtdh | -6.1041 | 0.0339 | 0.2888 | 0.6807 | 0.0338 |
| chr17_19160994_19250082_+ | Atxn1 | -6.2745 | 0.0068 | 0.1237 | 1.3614 | 0.0676 |
| chr3_3785953_3786880_+ | Gpsm1 | -6.2745 | 0.0068 | 0.1237 | 1.3614 | 0.0676 |
| chr19_34266719_34272145_+ | Arhgap10 | -6.5155 | 0.0027 | 0.1237 | 1.8719 | 0.0901 |
| chr2_231383147_231409493_- | not_annotated | -6.5495 | 0.0082 | 0.1237 | 1.1912 | 0.0563 |
| chr1_128526649_128586111_- | Lrrc28 | -6.6757 | 0.0488 | 0.3457 | 0.5105 | 0.0225 |
| chr10_96720686_96722491_+ | Cep112 | -6.6757 | 0.0488 | 0.3457 | 0.5105 | 0.0225 |
| chr11_87574249_87591013_- | Med15 | -6.6757 | 0.0488 | 0.3457 | 0.5105 | 0.0225 |
| chr12_24271680_24278827_+ | Hip1 | -6.6757 | 0.0488 | 0.3457 | 0.5105 | 0.0225 |
| chr13_83491767_83496846_- | Tiprl | -6.6757 | 0.0488 | 0.3457 | 0.5105 | 0.0225 |
| chr14_14574448_14578139_- | Fras1 | -6.6757 | 0.0488 | 0.3457 | 0.5105 | 0.0225 |
| chr14_15091390_15121067_+ | Cnot6l | -6.6757 | 0.0488 | 0.3457 | 0.5105 | 0.0225 |
| chr14_44962178_45002727_- | not_annotated | -6.6757 | 0.0488 | 0.3457 | 0.5105 | 0.0225 |
| chr14_86434307_86438230_+ | Ogdh | -6.6757 | 0.0488 | 0.3457 | 0.5105 | 0.0225 |
| chr16_80662286_80662714_+ | Erich1 | -6.6757 | 0.0488 | 0.3457 | 0.5105 | 0.0225 |
| chr17_79740146_79789485_- | Fam188a | -6.6757 | 0.0488 | 0.3457 | 0.5105 | 0.0225 |
| chr17_83567831_83575483_+ | Plxdc2 | -6.6757 | 0.0488 | 0.3457 | 0.5105 | 0.0225 |
| chr17_90598577_90598956_- | not_annotated | -6.6757 | 0.0488 | 0.3457 | 0.5105 | 0.0225 |
| chr18_13352206_13369652_+ | not_annotated | -6.6757 | 0.0488 | 0.3457 | 0.5105 | 0.0225 |
| chr2_100696652_100710426_+ | Ythdf3 | -6.6757 | 0.0488 | 0.3457 | 0.5105 | 0.0225 |
| chr2_189723524_189726207_+ | Gatad2b | -6.6757 | 0.0488 | 0.3457 | 0.5105 | 0.0225 |
| chr3_13277411_13288615_- | Pbx3 | -6.6757 | 0.0488 | 0.3457 | 0.5105 | 0.0225 |
| chr3_21859562_21904269_- | Strbp | -6.6757 | 0.0488 | 0.3457 | 0.5105 | 0.0225 |
| chr4_147527096_147528435_+ | Mkrn2 | -6.6757 | 0.0488 | 0.3457 | 0.5105 | 0.0225 |
| chr4_2521570_2527608_+ | not_annotated | -6.6757 | 0.0488 | 0.3457 | 0.5105 | 0.0225 |
| chr4_25978673_26192504_+ | Cdk14 | -6.6757 | 0.0488 | 0.3457 | 0.5105 | 0.0225 |
| chr5_107939444_107944269_+ | not_annotated | -6.6757 | 0.0488 | 0.3457 | 0.5105 | 0.0225 |
| chr5_4404517_4425481_+ | not_annotated | -6.6757 | 0.0488 | 0.3457 | 0.5105 | 0.0225 |
| chr5_72119820_72137041_+ | Rad23b | -6.6757 | 0.0488 | 0.3457 | 0.5105 | 0.0225 |
| chr6_43306391_43309313_+ | not_annotated | -6.6757 | 0.0488 | 0.3457 | 0.5105 | 0.0225 |
| chr7_2563911_2567090_- | Rbms2 | -6.6757 | 0.0488 | 0.3457 | 0.5105 | 0.0225 |
| chr7_30413737_30426040_+ | Uhrf1bp1l | -6.6757 | 0.0488 | 0.3457 | 0.5105 | 0.0225 |
| chr8_55395660_55402713_- | not_annotated | -6.6757 | 0.0488 | 0.3457 | 0.5105 | 0.0225 |
| chr9_111200425_111213103_- | Gin1 | -6.6757 | 0.0488 | 0.3457 | 0.5105 | 0.0225 |
| chr9_119694338_119706127_- | not_annotated | -6.6757 | 0.0488 | 0.3457 | 0.5105 | 0.0225 |
| chr9_44865856_44871773_- | Aff3 | -6.6757 | 0.0488 | 0.3457 | 0.5105 | 0.0225 |
| chr1_177651557_177654228_+ | Tead1 | -6.8315 | 0.0005 | 0.1237 | 3.4035 | 0.1577 |
| chr15_3465242_3485434_- | Vcl | -6.9552 | 0.0100 | 0.1237 | 1.0211 | 0.0451 |
| chr16_46262257_46424149_+ | Tenm3 | -6.9552 | 0.0100 | 0.1237 | 1.0211 | 0.0451 |
| chr18_28026848_28028197_+ | Ctnna1 | -6.9552 | 0.0100 | 0.1237 | 1.0211 | 0.0451 |
| chr8_127935694_127936912_- | Oxsr1 | -7.4794 | 0.0038 | 0.1237 | 1.3614 | 0.0563 |
| chr18_13336354_13404495_+ | not_annotated | -7.6139 | 0.0125 | 0.1459 | 0.8509 | 0.0338 |
| chr3_44459185_44464960_- | Acvr1 | -7.6139 | 0.0125 | 0.1459 | 0.8509 | 0.0338 |
| chr4_155716221_155718729_+ | Necap1 | -7.6139 | 0.0125 | 0.1459 | 0.8509 | 0.0338 |
| chr5_166185423_166191317_- | Ube4b | -7.6139 | 0.0125 | 0.1459 | 0.8509 | 0.0338 |
| chr5_4408215_4469629_+ | not_annotated | -7.6139 | 0.0125 | 0.1459 | 0.8509 | 0.0338 |
| chr19_29642344_29671928_- | Inpp4b | -7.6956 | 0.0008 | 0.1237 | 2.2123 | 0.0901 |
| chr1_90024085_90025377_- | not_annotated | -8.4094 | 0.0018 | 0.1237 | 1.5316 | 0.0563 |
| chr8_87100666_87102375_- | not_annotated | -8.4094 | 0.0018 | 0.1237 | 1.5316 | 0.0563 |
| chr1_154405931_154411147_+ | Picalm | -8.8696 | 0.0155 | 0.1747 | 0.6807 | 0.0225 |
| chr10_18218676_18238682_- | Ranbp17 | -8.8696 | 0.0155 | 0.1747 | 0.6807 | 0.0225 |
| chr17_83567831_83589045_+ | Plxdc2 | -8.8696 | 0.0155 | 0.1747 | 0.6807 | 0.0225 |
| chr17_9875749_9929565_- | Nsd1 | -8.8696 | 0.0155 | 0.1747 | 0.6807 | 0.0225 |
| chr2_80738889_80741520_- | not_annotated | -8.8696 | 0.0155 | 0.1747 | 0.6807 | 0.0225 |
| chr3_11325952_11328601_+ | Golga2 | -8.8696 | 0.0155 | 0.1747 | 0.6807 | 0.0225 |
| chr4_155661796_155662142_+ | Foxj2 | -8.8696 | 0.0155 | 0.1747 | 0.6807 | 0.0225 |
| chr6_136059672_136107031_+ | Mark3 | -8.8696 | 0.0155 | 0.1747 | 0.6807 | 0.0225 |
| chr7_25075293_25093708_+ | Nuak1 | -8.8696 | 0.0155 | 0.1747 | 0.6807 | 0.0225 |
| chr7_3268770_3275183_+ | Sarnp | -8.8696 | 0.0155 | 0.1747 | 0.6807 | 0.0225 |
| chr9_119805160_119807029_- | not_annotated | -8.8696 | 0.0155 | 0.1747 | 0.6807 | 0.0225 |
| chr9_37117758_37117919_- | Phf3 | -8.8696 | 0.0155 | 0.1747 | 0.6807 | 0.0225 |
| chr13_73255237_73265813_+ | Acbd6 | -9.1238 | 0.0047 | 0.1237 | 1.0211 | 0.0338 |
| chr5_74649971_74727622_+ | Palm2 | -9.1238 | 0.0047 | 0.1237 | 1.0211 | 0.0338 |
| chr6_129864989_129871224_+ | Vrk1 | -9.1238 | 0.0047 | 0.1237 | 1.0211 | 0.0338 |
| chr1_127569589_127570194_- | Asb7 | -11.0635 | 0.0051 | 0.1237 | 0.8509 | 0.0225 |
| chr19_22177001_22179584_- | Phkb | -11.0635 | 0.0051 | 0.1237 | 0.8509 | 0.0225 |
| chr19_29691444_29744346_- | Inpp4b | -11.0635 | 0.0051 | 0.1237 | 0.8509 | 0.0225 |
| chr20_32387177_32387362_- | Ccar1 | -11.0635 | 0.0051 | 0.1237 | 0.8509 | 0.0225 |
| chr1_20022792_20081200_+ | not_annotated | -12.2055 | 0.0180 | 0.1851 | 0.5105 | 0.0113 |
| chr1_255501514_255505999_+ | Tnks2 | -12.2055 | 0.0180 | 0.1851 | 0.5105 | 0.0113 |
| chr1_257393465_257394830_+ | Plce1 | -12.2055 | 0.0180 | 0.1851 | 0.5105 | 0.0113 |
| chr1_259434763_259450845_- | not_annotated | -12.2055 | 0.0180 | 0.1851 | 0.5105 | 0.0113 |
| chr1_265247181_265254011_+ | Btrc | -12.2055 | 0.0180 | 0.1851 | 0.5105 | 0.0113 |
| chr1_47949965_47952986_+ | Wtap | -12.2055 | 0.0180 | 0.1851 | 0.5105 | 0.0113 |
| chr10_39952995_39991584_+ | Rapgef6 | -12.2055 | 0.0180 | 0.1851 | 0.5105 | 0.0113 |
| chr11_82646627_82651452_- | Senp2 | -12.2055 | 0.0180 | 0.1851 | 0.5105 | 0.0113 |
| chr12_25579895_25583744_+ | Wbscr16 | -12.2055 | 0.0180 | 0.1851 | 0.5105 | 0.0113 |
| chr13_44866844_44868833_+ | R3hdm1 | -12.2055 | 0.0180 | 0.1851 | 0.5105 | 0.0113 |
| chr15_10416533_10423574_- | Ngly1 | -12.2055 | 0.0180 | 0.1851 | 0.5105 | 0.0113 |
| chr18_13415628_13417002_+ | not_annotated | -12.2055 | 0.0180 | 0.1851 | 0.5105 | 0.0113 |
| chr19_12906306_12906793_- | not_annotated | -12.2055 | 0.0180 | 0.1851 | 0.5105 | 0.0113 |
| chr19_16914612_16996896_- | Fto | -12.2055 | 0.0180 | 0.1851 | 0.5105 | 0.0113 |
| chr19_25252699_25254224_- | Cc2d1a | -12.2055 | 0.0180 | 0.1851 | 0.5105 | 0.0113 |
| chr2_200221473_200253557_+ | Notch2 | -12.2055 | 0.0180 | 0.1851 | 0.5105 | 0.0113 |
| chr20_28572245_28572520_+ | not_annotated | -12.2055 | 0.0180 | 0.1851 | 0.5105 | 0.0113 |
| chr20_44521278_44522731_+ | Fyn | -12.2055 | 0.0180 | 0.1851 | 0.5105 | 0.0113 |
| chr20_5090501_5090805_+ | Abhd16a | -12.2055 | 0.0180 | 0.1851 | 0.5105 | 0.0113 |
| chr3_136874645_136896550_- | Kif16b | -12.2055 | 0.0180 | 0.1851 | 0.5105 | 0.0113 |
| chr3_148357102_148363023_+ | Tpx2 | -12.2055 | 0.0180 | 0.1851 | 0.5105 | 0.0113 |
| chr3_152294624_152324968_+ | Phf20 | -12.2055 | 0.0180 | 0.1851 | 0.5105 | 0.0113 |
| chr3_94736244_94745177_- | Qser1 | -12.2055 | 0.0180 | 0.1851 | 0.5105 | 0.0113 |
| chr4_147458828_147471754_+ | Tsen2 | -12.2055 | 0.0180 | 0.1851 | 0.5105 | 0.0113 |
| chr4_180610928_180613165_- | Itpr2 | -12.2055 | 0.0180 | 0.1851 | 0.5105 | 0.0113 |
| chr4_57560121_57565270_- | Ube2h | -12.2055 | 0.0180 | 0.1851 | 0.5105 | 0.0113 |
| chr5_155691489_155709264_- | Cdc42 | -12.2055 | 0.0180 | 0.1851 | 0.5105 | 0.0113 |
| chr5_93024446_93058793_- | not_annotated | -12.2055 | 0.0180 | 0.1851 | 0.5105 | 0.0113 |
| chr6_105395367_105398311_+ | Ttc9 | -12.2055 | 0.0180 | 0.1851 | 0.5105 | 0.0113 |
| chr6_122607272_122614034_+ | Spata7 | -12.2055 | 0.0180 | 0.1851 | 0.5105 | 0.0113 |
| chr6_6627343_6668794_+ | Eml4 | -12.2055 | 0.0180 | 0.1851 | 0.5105 | 0.0113 |
| chr7_117659937_117660619_+ | Adck5 | -12.2055 | 0.0180 | 0.1851 | 0.5105 | 0.0113 |
| chr7_123685068_123715127_- | Tcf20 | -12.2055 | 0.0180 | 0.1851 | 0.5105 | 0.0113 |
| chr7_140840577_140845680_+ | Spats2 | -12.2055 | 0.0180 | 0.1851 | 0.5105 | 0.0113 |
| chr9_25415538_25420743_+ | Tfap2b | -12.2055 | 0.0180 | 0.1851 | 0.5105 | 0.0113 |
| chr9_81273370_81281375_- | Tns1 | -12.2055 | 0.0180 | 0.1851 | 0.5105 | 0.0113 |
| chrX_43575307_43585138_- | Acot9 | -12.2055 | 0.0180 | 0.1851 | 0.5105 | 0.0113 |
| chr7_142854832_142858134_+ | Acvr1b | -13.2574 | 0.0018 | 0.1237 | 1.0211 | 0.0225 |
| chr8_58182482_58182849_- | Acat1 | -13.2574 | 0.0018 | 0.1237 | 1.0211 | 0.0225 |
| chr1_209792071_209792497_+ | Glrx3 | -16.2168 | 0.0049 | 0.1237 | 0.6807 | 0.0113 |
| chr1_226673750_226674716_+ | Ddb1 | -16.2168 | 0.0049 | 0.1237 | 0.6807 | 0.0113 |
| chr10_48659695_48672469_- | Ncor1 | -16.2168 | 0.0049 | 0.1237 | 0.6807 | 0.0113 |
| chr14_9347790_9358699_+ | Wdfy3 | -16.2168 | 0.0049 | 0.1237 | 0.6807 | 0.0113 |
| chr18_13336354_13428569_+ | not_annotated | -16.2168 | 0.0049 | 0.1237 | 0.6807 | 0.0113 |
| chr2_189383959_189395748_- | Atp8b2 | -16.2168 | 0.0049 | 0.1237 | 0.6807 | 0.0113 |
| chr2_61054405_61137026_+ | Adamts12 | -16.2168 | 0.0049 | 0.1237 | 0.6807 | 0.0113 |
| chr5_144374584_144384746_- | Ago3 | -16.2168 | 0.0049 | 0.1237 | 0.6807 | 0.0113 |
| chr6_28272106_28272697_+ | Dnmt3a | -16.2168 | 0.0049 | 0.1237 | 0.6807 | 0.0113 |
| chrX_156468826_156468867_+ | Flna | -16.2168 | 0.0049 | 0.1237 | 0.6807 | 0.0113 |
| chr5_155850980_155851664_+ | not_annotated | -20.228 | 0.0014 | 0.1237 | 0.8509 | 0.0113 |
| chr18_65456672_65460654_+ | Tcf4 | -24.2393 | 0.0004 | 0.1237 | 1.0211 | 0.0113 |
| chr1_125135342_125138315_+ | Mtmr10 | -47.7396 | 0.0103 | 0.1237 | 0.3404 | 0.0000 |
| chr1_140140165_140141583_- | Ntrk3 | -47.7396 | 0.0103 | 0.1237 | 0.3404 | 0.0000 |
| chr1_142533729_142542201_- | Iqgap1 | -47.7396 | 0.0103 | 0.1237 | 0.3404 | 0.0000 |
| chr1_142562934_142565170_- | Iqgap1 | -47.7396 | 0.0103 | 0.1237 | 0.3404 | 0.0000 |
| chr1_144634000_144636842_+ | Eftud1 | -47.7396 | 0.0103 | 0.1237 | 0.3404 | 0.0000 |
| chr1_154439745_154442136_+ | Picalm | -47.7396 | 0.0103 | 0.1237 | 0.3404 | 0.0000 |
| chr1_162451867_162458782_+ | Ints4 | -47.7396 | 0.0103 | 0.1237 | 0.3404 | 0.0000 |
| chr1_164561999_164565992_+ | Arrb1 | -47.7396 | 0.0103 | 0.1237 | 0.3404 | 0.0000 |
| chr1_177569617_177654228_+ | Tead1 | -47.7396 | 0.0103 | 0.1237 | 0.3404 | 0.0000 |
| chr1_185263914_185270375_+ | Pik3c2a | -47.7396 | 0.0103 | 0.1237 | 0.3404 | 0.0000 |
| chr1_185289449_185294611_+ | Pik3c2a | -47.7396 | 0.0103 | 0.1237 | 0.3404 | 0.0000 |
| chr1_185559928_185563549_- | RGD1311703 | -47.7396 | 0.0103 | 0.1237 | 0.3404 | 0.0000 |
| chr1_191932207_191945144_- | Cog7 | -47.7396 | 0.0103 | 0.1237 | 0.3404 | 0.0000 |
| chr1_197067160_197069686_- | Gtf3c1 | -47.7396 | 0.0103 | 0.1237 | 0.3404 | 0.0000 |
| chr1_201544705_201548146_+ | Htra1 | -47.7396 | 0.0103 | 0.1237 | 0.3404 | 0.0000 |
| chr1_206151058_206177343_- | not_annotated | -47.7396 | 0.0103 | 0.1237 | 0.3404 | 0.0000 |
| chr1_214562895_214581689_+ | Ap2a2 | -47.7396 | 0.0103 | 0.1237 | 0.3404 | 0.0000 |
| chr1_21561046_21572359_- | Med23 | -47.7396 | 0.0103 | 0.1237 | 0.3404 | 0.0000 |
| chr1_218832599_218844420_- | Lrp5 | -47.7396 | 0.0103 | 0.1237 | 0.3404 | 0.0000 |
| chr1_219600351_219638528_- | Kdm2a | -47.7396 | 0.0103 | 0.1237 | 0.3404 | 0.0000 |
| chr1_221743003_221746017_+ | Sf1 | -47.7396 | 0.0103 | 0.1237 | 0.3404 | 0.0000 |
| chr1_242626963_242631822_- | Pgm5 | -47.7396 | 0.0103 | 0.1237 | 0.3404 | 0.0000 |
| chr1_250573135_250583564_- | Asah2 | -47.7396 | 0.0103 | 0.1237 | 0.3404 | 0.0000 |
| chr1_250855392_250919167_- | Sgms1 | -47.7396 | 0.0103 | 0.1237 | 0.3404 | 0.0000 |
| chr1_253264936_253275400_+ | Kif20b | -47.7396 | 0.0103 | 0.1237 | 0.3404 | 0.0000 |
| chr1_276486933_276487677_+ | Vti1a | -47.7396 | 0.0103 | 0.1237 | 0.3404 | 0.0000 |
| chr1_277755154_277768170_- | Afap1l2 | -47.7396 | 0.0103 | 0.1237 | 0.3404 | 0.0000 |
| chr1_282155276_282162201_- | Eif3a | -47.7396 | 0.0103 | 0.1237 | 0.3404 | 0.0000 |
| chr1_282190810_282202180_+ | Fam45a | -47.7396 | 0.0103 | 0.1237 | 0.3404 | 0.0000 |
| chr1_40900573_40900794_+ | Akap12 | -47.7396 | 0.0103 | 0.1237 | 0.3404 | 0.0000 |
| chr1_48220382_48221758_+ | Igf2r | -47.7396 | 0.0103 | 0.1237 | 0.3404 | 0.0000 |
| chr1_6575079_6601608_- | Utrn | -47.7396 | 0.0103 | 0.1237 | 0.3404 | 0.0000 |
| chr1_72302573_72308741_- | Epn1 | -47.7396 | 0.0103 | 0.1237 | 0.3404 | 0.0000 |
| chr1_80502661_80502800_- | not_annotated | -47.7396 | 0.0103 | 0.1237 | 0.3404 | 0.0000 |
| chr1_84652633_84654219_+ | not_annotated | -47.7396 | 0.0103 | 0.1237 | 0.3404 | 0.0000 |
| chr1_90024085_90032101_- | not_annotated | -47.7396 | 0.0103 | 0.1237 | 0.3404 | 0.0000 |
| chr1_90118871_90120765_- | RGD1308428 | -47.7396 | 0.0103 | 0.1237 | 0.3404 | 0.0000 |
| chr1_90207974_90215839_- | Lsm14a | -47.7396 | 0.0103 | 0.1237 | 0.3404 | 0.0000 |
| chr10_104125297_104125709_+ | Nup85 | -47.7396 | 0.0103 | 0.1237 | 0.3404 | 0.0000 |
| chr10_105748039_105771765_- | not_annotated | -47.7396 | 0.0103 | 0.1237 | 0.3404 | 0.0000 |
| chr10_110072090_110073053_- | not_annotated | -47.7396 | 0.0103 | 0.1237 | 0.3404 | 0.0000 |
| chr10_14560970_14572429_+ | not_annotated | -47.7396 | 0.0103 | 0.1237 | 0.3404 | 0.0000 |
| chr10_20634871_20650957_- | Rars | -47.7396 | 0.0103 | 0.1237 | 0.3404 | 0.0000 |
| chr10_35807360_35809197_- | Canx | -47.7396 | 0.0103 | 0.1237 | 0.3404 | 0.0000 |
| chr10_37167400_37185721_- | Sec24a | -47.7396 | 0.0103 | 0.1237 | 0.3404 | 0.0000 |
| chr10_37240828_37243464_+ | Sar1b | -47.7396 | 0.0103 | 0.1237 | 0.3404 | 0.0000 |
| chr10_38894115_38894558_+ | 8-Sep | -47.7396 | 0.0103 | 0.1237 | 0.3404 | 0.0000 |
| chr10_39916622_39923049_+ | Rapgef6 | -47.7396 | 0.0103 | 0.1237 | 0.3404 | 0.0000 |
| chr10_46193279_46194858_- | Cops3 | -47.7396 | 0.0103 | 0.1237 | 0.3404 | 0.0000 |
| chr10_55579627_55579967_- | Pfas | -47.7396 | 0.0103 | 0.1237 | 0.3404 | 0.0000 |
| chr10_583446_593608_- | Abcc1 | -47.7396 | 0.0103 | 0.1237 | 0.3404 | 0.0000 |
| chr10_62231971_62237402_+ | Smyd4 | -47.7396 | 0.0103 | 0.1237 | 0.3404 | 0.0000 |
| chr10_63840631_63840996_+ | Crk | -47.7396 | 0.0103 | 0.1237 | 0.3404 | 0.0000 |
| chr10_65002090_65026738_- | Myo18a | -47.7396 | 0.0103 | 0.1237 | 0.3404 | 0.0000 |
| chr10_65019412_65026738_- | Myo18a | -47.7396 | 0.0103 | 0.1237 | 0.3404 | 0.0000 |
| chr10_67450815_67462581_+ | not_annotated | -47.7396 | 0.0103 | 0.1237 | 0.3404 | 0.0000 |
| chr10_74277341_74277654_- | Ypel2 | -47.7396 | 0.0103 | 0.1237 | 0.3404 | 0.0000 |
| chr10_76253876_76261188_- | Scpep1 | -47.7396 | 0.0103 | 0.1237 | 0.3404 | 0.0000 |
| chr10_82378184_82378735_+ | Mrpl27 | -47.7396 | 0.0103 | 0.1237 | 0.3404 | 0.0000 |
| chr10_83856659_83863639_+ | Snf8 | -47.7396 | 0.0103 | 0.1237 | 0.3404 | 0.0000 |
| chr10_85662848_85672493_- | Pip4k2b | -47.7396 | 0.0103 | 0.1237 | 0.3404 | 0.0000 |
| chr10_88861805_88863322_- | Ptrf | -47.7396 | 0.0103 | 0.1237 | 0.3404 | 0.0000 |
| chr10_88930821_88959848_+ | Atp6v0a1 | -47.7396 | 0.0103 | 0.1237 | 0.3404 | 0.0000 |
| chr10_89658158_89663185_+ | Dhx8 | -47.7396 | 0.0103 | 0.1237 | 0.3404 | 0.0000 |
| chr10_91018016_91018199_- | not_annotated | -47.7396 | 0.0103 | 0.1237 | 0.3404 | 0.0000 |
| chr10_91742806_91748081_- | Gosr2 | -47.7396 | 0.0103 | 0.1237 | 0.3404 | 0.0000 |
| chr10_93439729_93441515_+ | Tlk2 | -47.7396 | 0.0103 | 0.1237 | 0.3404 | 0.0000 |
| chr10_93878070_93921257_+ | Tanc2 | -47.7396 | 0.0103 | 0.1237 | 0.3404 | 0.0000 |
| chr10_96811460_96814359_+ | Cep112 | -47.7396 | 0.0103 | 0.1237 | 0.3404 | 0.0000 |
| chr11_30008226_30061172_- | Tiam1 | -47.7396 | 0.0103 | 0.1237 | 0.3404 | 0.0000 |
| chr11_34631080_34738852_+ | Ttc3 | -47.7396 | 0.0103 | 0.1237 | 0.3404 | 0.0000 |
| chr11_45487965_45498625_- | Tomm70a | -47.7396 | 0.0103 | 0.1237 | 0.3404 | 0.0000 |
| chr11_65083706_65208765_- | Gsk3b | -47.7396 | 0.0103 | 0.1237 | 0.3404 | 0.0000 |
| chr11_71037756_71047468_- | not_annotated | -47.7396 | 0.0103 | 0.1237 | 0.3404 | 0.0000 |
| chr11_72848908_72854598_- | not_annotated | -47.7396 | 0.0103 | 0.1237 | 0.3404 | 0.0000 |
| chr11_84339457_84350242_- | Yeats2 | -47.7396 | 0.0103 | 0.1237 | 0.3404 | 0.0000 |
| chr11_86730684_86731950_+ | Comt | -47.7396 | 0.0103 | 0.1237 | 0.3404 | 0.0000 |
| chr11_87896642_87902134_+ | Pi4ka | -47.7396 | 0.0103 | 0.1237 | 0.3404 | 0.0000 |
| chr11_89253753_89254600_- | Spidr | -47.7396 | 0.0103 | 0.1237 | 0.3404 | 0.0000 |
| chr12_10499000_10534685_- | Cdk8 | -47.7396 | 0.0103 | 0.1237 | 0.3404 | 0.0000 |
| chr12_11500477_11509060_+ | Smurf1 | -47.7396 | 0.0103 | 0.1237 | 0.3404 | 0.0000 |
| chr12_13717975_13718379_+ | Actb | -47.7396 | 0.0103 | 0.1237 | 0.3404 | 0.0000 |
| chr12_13719085_13719388_+ | not_annotated | -47.7396 | 0.0103 | 0.1237 | 0.3404 | 0.0000 |
| chr12_1686544_1703259_- | Insr | -47.7396 | 0.0103 | 0.1237 | 0.3404 | 0.0000 |
| chr12_36738269_36745269_+ | Scarb1 | -47.7396 | 0.0103 | 0.1237 | 0.3404 | 0.0000 |
| chr12_38582195_38583083_- | not_annotated | -47.7396 | 0.0103 | 0.1237 | 0.3404 | 0.0000 |
| chr12_40287566_40294628_- | not_annotated | -47.7396 | 0.0103 | 0.1237 | 0.3404 | 0.0000 |
| chr12_47286246_47286938_- | not_annotated | -47.7396 | 0.0103 | 0.1237 | 0.3404 | 0.0000 |
| chr12_9229552_9238470_- | not_annotated | -47.7396 | 0.0103 | 0.1237 | 0.3404 | 0.0000 |
| chr13_101730680_101732557_- | not_annotated | -47.7396 | 0.0103 | 0.1237 | 0.3404 | 0.0000 |
| chr13_109624047_109624906_- | not_annotated | -47.7396 | 0.0103 | 0.1237 | 0.3404 | 0.0000 |
| chr13_26796944_26807859_- | Kdsr | -47.7396 | 0.0103 | 0.1237 | 0.3404 | 0.0000 |
| chr13_35695199_35713684_- | Ptpn4 | -47.7396 | 0.0103 | 0.1237 | 0.3404 | 0.0000 |
| chr13_35728572_35736524_- | Ptpn4 | -47.7396 | 0.0103 | 0.1237 | 0.3404 | 0.0000 |
| chr13_45094555_45099733_- | Dars | -47.7396 | 0.0103 | 0.1237 | 0.3404 | 0.0000 |
| chr13_51156213_51166706_- | Ppfia4 | -47.7396 | 0.0103 | 0.1237 | 0.3404 | 0.0000 |
| chr13_55515759_55532981_- | Nek7 | -47.7396 | 0.0103 | 0.1237 | 0.3404 | 0.0000 |
| chr13_68806567_68815040_+ | Trmt1l | -47.7396 | 0.0103 | 0.1237 | 0.3404 | 0.0000 |
| chr13_70269829_70271133_- | Smg7 | -47.7396 | 0.0103 | 0.1237 | 0.3404 | 0.0000 |
| chr13_70674465_70674983_- | not_annotated | -47.7396 | 0.0103 | 0.1237 | 0.3404 | 0.0000 |
| chr13_70698871_70703404_- | Lamc1 | -47.7396 | 0.0103 | 0.1237 | 0.3404 | 0.0000 |
| chr13_72965791_72969502_- | Xpr1 | -47.7396 | 0.0103 | 0.1237 | 0.3404 | 0.0000 |
| chr13_73239822_73255342_+ | Acbd6 | -47.7396 | 0.0103 | 0.1237 | 0.3404 | 0.0000 |
| chr13_74861060_74875355_- | Rasal2 | -47.7396 | 0.0103 | 0.1237 | 0.3404 | 0.0000 |
| chr13_83579111_83588797_- | Dcaf6 | -47.7396 | 0.0103 | 0.1237 | 0.3404 | 0.0000 |
| chr13_83606922_83660292_- | Dcaf6 | -47.7396 | 0.0103 | 0.1237 | 0.3404 | 0.0000 |
| chr13_95128660_95230772_- | Akt3 | -47.7396 | 0.0103 | 0.1237 | 0.3404 | 0.0000 |
| chr13_95230647_95234977_- | Akt3 | -47.7396 | 0.0103 | 0.1237 | 0.3404 | 0.0000 |
| chr14_108241139_108251386_+ | Usp34 | -47.7396 | 0.0103 | 0.1237 | 0.3404 | 0.0000 |
| chr14_108491381_108501925_- | not_annotated | -47.7396 | 0.0103 | 0.1237 | 0.3404 | 0.0000 |
| chr14_19439807_19440412_+ | Cox18 | -47.7396 | 0.0103 | 0.1237 | 0.3404 | 0.0000 |
| chr14_20662363_20662701_- | Slc4a4 | -47.7396 | 0.0103 | 0.1237 | 0.3404 | 0.0000 |
| chr14_2138237_2145090_+ | Gak | -47.7396 | 0.0103 | 0.1237 | 0.3404 | 0.0000 |
| chr14_44221926_44239819_+ | Pds5a | -47.7396 | 0.0103 | 0.1237 | 0.3404 | 0.0000 |
| chr14_44675095_44681076_+ | Rfc1 | -47.7396 | 0.0103 | 0.1237 | 0.3404 | 0.0000 |
| chr14_60474456_60488159_- | Anapc4 | -47.7396 | 0.0103 | 0.1237 | 0.3404 | 0.0000 |
| chr14_66883602_66886417_- | Slit2 | -47.7396 | 0.0103 | 0.1237 | 0.3404 | 0.0000 |
| chr14_71933119_71959067_- | not_annotated | -47.7396 | 0.0103 | 0.1237 | 0.3404 | 0.0000 |
| chr14_83464422_83464695_- | Drg1 | -47.7396 | 0.0103 | 0.1237 | 0.3404 | 0.0000 |
| chr14_84450104_84450744_+ | Gatsl3 | -47.7396 | 0.0103 | 0.1237 | 0.3404 | 0.0000 |
| chr14_85584909_85586061_- | not_annotated | -47.7396 | 0.0103 | 0.1237 | 0.3404 | 0.0000 |
| chr15_102403978_102404136_+ | not_annotated | -47.7396 | 0.0103 | 0.1237 | 0.3404 | 0.0000 |
| chr15_16170084_16224620_+ | not_annotated | -47.7396 | 0.0103 | 0.1237 | 0.3404 | 0.0000 |
| chr15_18573054_18594643_- | Pxk | -47.7396 | 0.0103 | 0.1237 | 0.3404 | 0.0000 |
| chr15_19808241_19808798_- | Fermt2 | -47.7396 | 0.0103 | 0.1237 | 0.3404 | 0.0000 |
| chr15_24048554_24052488_- | Wdhd1 | -47.7396 | 0.0103 | 0.1237 | 0.3404 | 0.0000 |
| chr15_33558468_33558619_+ | Pabpn1 | -47.7396 | 0.0103 | 0.1237 | 0.3404 | 0.0000 |
| chr15_37157448_37225781_+ | not_annotated | -47.7396 | 0.0103 | 0.1237 | 0.3404 | 0.0000 |
| chr15_41254629_41315828_- | Tnfrsf19 | -47.7396 | 0.0103 | 0.1237 | 0.3404 | 0.0000 |
| chr15_42981487_42982243_+ | not_annotated | -47.7396 | 0.0103 | 0.1237 | 0.3404 | 0.0000 |
| chr16_10776618_10789158_- | Bmpr1a | -47.7396 | 0.0103 | 0.1237 | 0.3404 | 0.0000 |
| chr16_19390228_19392993_- | Tpm4 | -47.7396 | 0.0103 | 0.1237 | 0.3404 | 0.0000 |
| chr16_20646666_20651346_- | Fkbp8 | -47.7396 | 0.0103 | 0.1237 | 0.3404 | 0.0000 |
| chr16_20776310_20780815_+ | Crtc1 | -47.7396 | 0.0103 | 0.1237 | 0.3404 | 0.0000 |
| chr16_2102749_2128403_- | Slmap | -47.7396 | 0.0103 | 0.1237 | 0.3404 | 0.0000 |
| chr16_21102344_21102837_- | Sugp1 | -47.7396 | 0.0103 | 0.1237 | 0.3404 | 0.0000 |
| chr16_46756476_46781431_+ | Tenm3 | -47.7396 | 0.0103 | 0.1237 | 0.3404 | 0.0000 |
| chr16_50390276_50390935_- | Fat1 | -47.7396 | 0.0103 | 0.1237 | 0.3404 | 0.0000 |
| chr16_54054981_54061335_- | Pcm1 | -47.7396 | 0.0103 | 0.1237 | 0.3404 | 0.0000 |
| chr16_54075609_54083293_- | Pcm1 | -47.7396 | 0.0103 | 0.1237 | 0.3404 | 0.0000 |
| chr16_54478109_54479512_- | Slc7a2 | -47.7396 | 0.0103 | 0.1237 | 0.3404 | 0.0000 |
| chr16_62222412_62226896_- | Gsr | -47.7396 | 0.0103 | 0.1237 | 0.3404 | 0.0000 |
| chr16_62523581_62538612_+ | not_annotated | -47.7396 | 0.0103 | 0.1237 | 0.3404 | 0.0000 |
| chr16_6675481_6675744_- | Prkcd | -47.7396 | 0.0103 | 0.1237 | 0.3404 | 0.0000 |
| chr16_6805605_6806323_+ | not_annotated | -47.7396 | 0.0103 | 0.1237 | 0.3404 | 0.0000 |
| chr16_71239986_71240406_- | not_annotated | -47.7396 | 0.0103 | 0.1237 | 0.3404 | 0.0000 |
| chr16_74726583_74730359_- | Vps36 | -47.7396 | 0.0103 | 0.1237 | 0.3404 | 0.0000 |
| chr16_74726833_74726982_- | not_annotated | -47.7396 | 0.0103 | 0.1237 | 0.3404 | 0.0000 |
| chr16_79762493_79763707_- | not_annotated | -47.7396 | 0.0103 | 0.1237 | 0.3404 | 0.0000 |
| chr17_1766090_1770085_- | Cdc14b | -47.7396 | 0.0103 | 0.1237 | 0.3404 | 0.0000 |
| chr17_20187546_20363753_- | not_annotated | -47.7396 | 0.0103 | 0.1237 | 0.3404 | 0.0000 |
| chr17_36120094_36121325_- | Mboat1 | -47.7396 | 0.0103 | 0.1237 | 0.3404 | 0.0000 |
| chr17_36398788_36404796_+ | E2f3 | -47.7396 | 0.0103 | 0.1237 | 0.3404 | 0.0000 |
| chr17_52515729_52555114_- | Gli3 | -47.7396 | 0.0103 | 0.1237 | 0.3404 | 0.0000 |
| chr17_63700912_63716786_+ | Dip2c | -47.7396 | 0.0103 | 0.1237 | 0.3404 | 0.0000 |
| chr17_6794838_6802277_+ | Gkap1 | -47.7396 | 0.0103 | 0.1237 | 0.3404 | 0.0000 |
| chr17_6970718_7017383_+ | not_annotated | -47.7396 | 0.0103 | 0.1237 | 0.3404 | 0.0000 |
| chr17_70266399_70271973_+ | not_annotated | -47.7396 | 0.0103 | 0.1237 | 0.3404 | 0.0000 |
| chr17_79759287_79789485_- | Fam188a | -47.7396 | 0.0103 | 0.1237 | 0.3404 | 0.0000 |
| chr17_80451492_80454996_- | not_annotated | -47.7396 | 0.0103 | 0.1237 | 0.3404 | 0.0000 |
| chr17_82030023_82049208_- | Nsun6 | -47.7396 | 0.0103 | 0.1237 | 0.3404 | 0.0000 |
| chr17_83222662_83375581_+ | Plxdc2 | -47.7396 | 0.0103 | 0.1237 | 0.3404 | 0.0000 |
| chr18_13324086_13404495_+ | not_annotated | -47.7396 | 0.0103 | 0.1237 | 0.3404 | 0.0000 |
| chr18_1344261_1346489_- | Rock1 | -47.7396 | 0.0103 | 0.1237 | 0.3404 | 0.0000 |
| chr18_14608935_14643454_+ | not_annotated | -47.7396 | 0.0103 | 0.1237 | 0.3404 | 0.0000 |
| chr18_24464585_24478015_+ | not_annotated | -47.7396 | 0.0103 | 0.1237 | 0.3404 | 0.0000 |
| chr18_27601040_27614705_+ | not_annotated | -47.7396 | 0.0103 | 0.1237 | 0.3404 | 0.0000 |
| chr18_28595005_28597803_+ | Ube2d2 | -47.7396 | 0.0103 | 0.1237 | 0.3404 | 0.0000 |
| chr18_28602652_28603005_+ | Ube2d2 | -47.7396 | 0.0103 | 0.1237 | 0.3404 | 0.0000 |
| chr18_37745348_37748032_- | Dpysl3 | -47.7396 | 0.0103 | 0.1237 | 0.3404 | 0.0000 |
| chr18_49891333_49906496_- | Zfp608 | -47.7396 | 0.0103 | 0.1237 | 0.3404 | 0.0000 |
| chr18_58390344_58395177_- | not_annotated | -47.7396 | 0.0103 | 0.1237 | 0.3404 | 0.0000 |
| chr18_63828377_63844188_+ | Ldlrad4 | -47.7396 | 0.0103 | 0.1237 | 0.3404 | 0.0000 |
| chr18_75127208_75263369_- | not_annotated | -47.7396 | 0.0103 | 0.1237 | 0.3404 | 0.0000 |
| chr18_81267544_81289889_- | not_annotated | -47.7396 | 0.0103 | 0.1237 | 0.3404 | 0.0000 |
| chr18_81424260_81428974_- | not_annotated | -47.7396 | 0.0103 | 0.1237 | 0.3404 | 0.0000 |
| chr19_12795296_12796904_- | Large | -47.7396 | 0.0103 | 0.1237 | 0.3404 | 0.0000 |
| chr19_17424613_17440665_- | not_annotated | -47.7396 | 0.0103 | 0.1237 | 0.3404 | 0.0000 |
| chr19_29642344_29691609_- | Inpp4b | -47.7396 | 0.0103 | 0.1237 | 0.3404 | 0.0000 |
| chr19_32778231_32781498_+ | Lsm6 | -47.7396 | 0.0103 | 0.1237 | 0.3404 | 0.0000 |
| chr19_55312024_55312742_- | Piezo1 | -47.7396 | 0.0103 | 0.1237 | 0.3404 | 0.0000 |
| chr19_56064264_56064931_+ | not_annotated | -47.7396 | 0.0103 | 0.1237 | 0.3404 | 0.0000 |
| chr19_5933542_5934014_- | not_annotated | -47.7396 | 0.0103 | 0.1237 | 0.3404 | 0.0000 |
| chr19_59340980_59347163_- | not_annotated | -47.7396 | 0.0103 | 0.1237 | 0.3404 | 0.0000 |
| chr19_61052581_61054289_+ | not_annotated | -47.7396 | 0.0103 | 0.1237 | 0.3404 | 0.0000 |
| chr19_820019_821572_+ | Cmtm4 | -47.7396 | 0.0103 | 0.1237 | 0.3404 | 0.0000 |
| chr2_107346868_107347207_+ | Tbl1xr1 | -47.7396 | 0.0103 | 0.1237 | 0.3404 | 0.0000 |
| chr2_123682936_123696686_+ | not_annotated | -47.7396 | 0.0103 | 0.1237 | 0.3404 | 0.0000 |
| chr2_128599095_128636580_- | Sclt1 | -47.7396 | 0.0103 | 0.1237 | 0.3404 | 0.0000 |
| chr2_144849839_144866101_+ | Dclk1 | -47.7396 | 0.0103 | 0.1237 | 0.3404 | 0.0000 |
| chr2_172320126_172322184_- | Schip1 | -47.7396 | 0.0103 | 0.1237 | 0.3404 | 0.0000 |
| chr2_178272370_178282786_- | Fnip2 | -47.7396 | 0.0103 | 0.1237 | 0.3404 | 0.0000 |
| chr2_18525795_18531203_- | Vcan | -47.7396 | 0.0103 | 0.1237 | 0.3404 | 0.0000 |
| chr2_187525298_187529234_+ | Mef2d | -47.7396 | 0.0103 | 0.1237 | 0.3404 | 0.0000 |
| chr2_189354110_189395748_- | Atp8b2 | -47.7396 | 0.0103 | 0.1237 | 0.3404 | 0.0000 |
| chr2_189361951_189364938_- | Atp8b2 | -47.7396 | 0.0103 | 0.1237 | 0.3404 | 0.0000 |
| chr2_189387511_189395748_- | Atp8b2 | -47.7396 | 0.0103 | 0.1237 | 0.3404 | 0.0000 |
| chr2_189998553_189999522_+ | S100a4 | -47.7396 | 0.0103 | 0.1237 | 0.3404 | 0.0000 |
| chr2_198933682_198940577_+ | not_annotated | -47.7396 | 0.0103 | 0.1237 | 0.3404 | 0.0000 |
| chr2_204030458_204030814_- | not_annotated | -47.7396 | 0.0103 | 0.1237 | 0.3404 | 0.0000 |
| chr2_204030463_204030819_- | not_annotated | -47.7396 | 0.0103 | 0.1237 | 0.3404 | 0.0000 |
| chr2_204581807_204583467_- | Vangl1 | -47.7396 | 0.0103 | 0.1237 | 0.3404 | 0.0000 |
| chr2_205828549_205831804_+ | not_annotated | -47.7396 | 0.0103 | 0.1237 | 0.3404 | 0.0000 |
| chr2_206231481_206238923_- | Hipk1 | -47.7396 | 0.0103 | 0.1237 | 0.3404 | 0.0000 |
| chr2_207119352_207127766_+ | Slc16a1 | -47.7396 | 0.0103 | 0.1237 | 0.3404 | 0.0000 |
| chr2_216483231_216484405_- | Rnpc3 | -47.7396 | 0.0103 | 0.1237 | 0.3404 | 0.0000 |
| chr2_22038220_22039401_- | Fam151b | -47.7396 | 0.0103 | 0.1237 | 0.3404 | 0.0000 |
| chr2_22093619_22096951_- | Zfyve16 | -47.7396 | 0.0103 | 0.1237 | 0.3404 | 0.0000 |
| chr2_232001887_232003640_- | not_annotated | -47.7396 | 0.0103 | 0.1237 | 0.3404 | 0.0000 |
| chr2_238237568_238246933_- | Gstcd | -47.7396 | 0.0103 | 0.1237 | 0.3404 | 0.0000 |
| chr2_238245237_238246933_- | Gstcd | -47.7396 | 0.0103 | 0.1237 | 0.3404 | 0.0000 |
| chr2_238557671_238566933_+ | Ppa2 | -47.7396 | 0.0103 | 0.1237 | 0.3404 | 0.0000 |
| chr2_240433404_240441148_+ | not_annotated | -47.7396 | 0.0103 | 0.1237 | 0.3404 | 0.0000 |
| chr2_247824863_247883656_- | Pdlim5 | -47.7396 | 0.0103 | 0.1237 | 0.3404 | 0.0000 |
| chr2_250500409_250507328_- | Hs2st1 | -47.7396 | 0.0103 | 0.1237 | 0.3404 | 0.0000 |
| chr2_251316582_251345298_+ | not_annotated | -47.7396 | 0.0103 | 0.1237 | 0.3404 | 0.0000 |
| chr2_27991009_27999833_- | Hexb | -47.7396 | 0.0103 | 0.1237 | 0.3404 | 0.0000 |
| chr2_33950934_33952806_- | not_annotated | -47.7396 | 0.0103 | 0.1237 | 0.3404 | 0.0000 |
| chr2_56120536_56133931_- | Osmr | -47.7396 | 0.0103 | 0.1237 | 0.3404 | 0.0000 |
| chr2_57520890_57527096_- | not_annotated | -47.7396 | 0.0103 | 0.1237 | 0.3404 | 0.0000 |
| chr2_61887108_61887426_- | not_annotated | -47.7396 | 0.0103 | 0.1237 | 0.3404 | 0.0000 |
| chr2_61889126_61949945_- | Npr3 | -47.7396 | 0.0103 | 0.1237 | 0.3404 | 0.0000 |
| chr2_63101178_63101253_- | Cdh6 | -47.7396 | 0.0103 | 0.1237 | 0.3404 | 0.0000 |
| chr2_77985145_78005821_+ | Myo10 | -47.7396 | 0.0103 | 0.1237 | 0.3404 | 0.0000 |
| chr2_80226167_80256271_+ | Ankh | -47.7396 | 0.0103 | 0.1237 | 0.3404 | 0.0000 |
| chr2_80738848_80741520_- | not_annotated | -47.7396 | 0.0103 | 0.1237 | 0.3404 | 0.0000 |
| chr2_88290523_88297769_- | Car13 | -47.7396 | 0.0103 | 0.1237 | 0.3404 | 0.0000 |
| chr20_19381829_19383486_- | not_annotated | -47.7396 | 0.0103 | 0.1237 | 0.3404 | 0.0000 |
| chr20_26781151_26787536_+ | Herc4 | -47.7396 | 0.0103 | 0.1237 | 0.3404 | 0.0000 |
| chr20_27258144_27261146_- | not_annotated | -47.7396 | 0.0103 | 0.1237 | 0.3404 | 0.0000 |
| chr20_38969641_38979343_- | Serinc1 | -47.7396 | 0.0103 | 0.1237 | 0.3404 | 0.0000 |
| chr20_50676394_50699734_+ | Hace1 | -47.7396 | 0.0103 | 0.1237 | 0.3404 | 0.0000 |
| chr3_109863809_109864225_+ | Thbs1 | -47.7396 | 0.0103 | 0.1237 | 0.3404 | 0.0000 |
| chr3_110068534_110079077_- | not_annotated | -47.7396 | 0.0103 | 0.1237 | 0.3404 | 0.0000 |
| chr3_110880970_110887104_+ | Casc5 | -47.7396 | 0.0103 | 0.1237 | 0.3404 | 0.0000 |
| chr3_111713473_111732677_+ | not_annotated | -47.7396 | 0.0103 | 0.1237 | 0.3404 | 0.0000 |
| chr3_111885170_111892291_- | Ehd4 | -47.7396 | 0.0103 | 0.1237 | 0.3404 | 0.0000 |
| chr3_117379828_117381476_- | Myef2 | -47.7396 | 0.0103 | 0.1237 | 0.3404 | 0.0000 |
| chr3_120328719_120332619_- | Nphp1 | -47.7396 | 0.0103 | 0.1237 | 0.3404 | 0.0000 |
| chr3_120363064_120366014_- | Nphp1 | -47.7396 | 0.0103 | 0.1237 | 0.3404 | 0.0000 |
| chr3_123249654_123250752_- | RGD1565616 | -47.7396 | 0.0103 | 0.1237 | 0.3404 | 0.0000 |
| chr3_13389506_13401195_- | not_annotated | -47.7396 | 0.0103 | 0.1237 | 0.3404 | 0.0000 |
| chr3_148158808_148167183_+ | Hm13 | -47.7396 | 0.0103 | 0.1237 | 0.3404 | 0.0000 |
| chr3_148357102_148359588_+ | Tpx2 | -47.7396 | 0.0103 | 0.1237 | 0.3404 | 0.0000 |
| chr3_150005719_150031135_+ | Cbfa2t2 | -47.7396 | 0.0103 | 0.1237 | 0.3404 | 0.0000 |
| chr3_150031067_150033957_+ | Cbfa2t2 | -47.7396 | 0.0103 | 0.1237 | 0.3404 | 0.0000 |
| chr3_150919838_150932187_- | Ncoa6 | -47.7396 | 0.0103 | 0.1237 | 0.3404 | 0.0000 |
| chr3_154255774_154285072_+ | Ctnnbl1 | -47.7396 | 0.0103 | 0.1237 | 0.3404 | 0.0000 |
| chr3_161224653_161232999_+ | Dnttip1 | -47.7396 | 0.0103 | 0.1237 | 0.3404 | 0.0000 |
| chr3_163594007_163595055_+ | Arfgef2 | -47.7396 | 0.0103 | 0.1237 | 0.3404 | 0.0000 |
| chr3_176189688_176196406_- | not_annotated | -47.7396 | 0.0103 | 0.1237 | 0.3404 | 0.0000 |
| chr3_177108718_177113017_+ | Prpf6 | -47.7396 | 0.0103 | 0.1237 | 0.3404 | 0.0000 |
| chr3_2008341_2037677_- | Ehmt1 | -47.7396 | 0.0103 | 0.1237 | 0.3404 | 0.0000 |
| chr3_22083652_22120064_- | Dennd1a | -47.7396 | 0.0103 | 0.1237 | 0.3404 | 0.0000 |
| chr3_33044198_33065432_- | Orc4 | -47.7396 | 0.0103 | 0.1237 | 0.3404 | 0.0000 |
| chr3_33044198_33069332_- | Orc4 | -47.7396 | 0.0103 | 0.1237 | 0.3404 | 0.0000 |
| chr3_57069326_57389901_- | Tlk1 | -47.7396 | 0.0103 | 0.1237 | 0.3404 | 0.0000 |
| chr3_58041790_58067040_+ | Hat1 | -47.7396 | 0.0103 | 0.1237 | 0.3404 | 0.0000 |
| chr3_62491323_62491541_+ | Hnrnpa3 | -47.7396 | 0.0103 | 0.1237 | 0.3404 | 0.0000 |
| chr3_63615004_63624328_+ | not_annotated | -47.7396 | 0.0103 | 0.1237 | 0.3404 | 0.0000 |
| chr3_63975563_63983972_- | not_annotated | -47.7396 | 0.0103 | 0.1237 | 0.3404 | 0.0000 |
| chr3_67740054_67742667_- | Nckap1 | -47.7396 | 0.0103 | 0.1237 | 0.3404 | 0.0000 |
| chr3_71149432_71195406_+ | not_annotated | -47.7396 | 0.0103 | 0.1237 | 0.3404 | 0.0000 |
| chr3_71261722_71262783_+ | not_annotated | -47.7396 | 0.0103 | 0.1237 | 0.3404 | 0.0000 |
| chr3_7439642_7475230_+ | Ddx31 | -47.7396 | 0.0103 | 0.1237 | 0.3404 | 0.0000 |
| chr3_80383472_80395207_+ | Lrp4 | -47.7396 | 0.0103 | 0.1237 | 0.3404 | 0.0000 |
| chr3_81127393_81140962_+ | not_annotated | -47.7396 | 0.0103 | 0.1237 | 0.3404 | 0.0000 |
| chr3_82575880_82586330_+ | Alx4 | -47.7396 | 0.0103 | 0.1237 | 0.3404 | 0.0000 |
| chr3_82582871_82586330_+ | Alx4 | -47.7396 | 0.0103 | 0.1237 | 0.3404 | 0.0000 |
| chr3_83005789_83008399_- | Hsd17b12 | -47.7396 | 0.0103 | 0.1237 | 0.3404 | 0.0000 |
| chr3_8887380_8892631_+ | not_annotated | -47.7396 | 0.0103 | 0.1237 | 0.3404 | 0.0000 |
| chr4_115172805_115191480_- | Dguok | -47.7396 | 0.0103 | 0.1237 | 0.3404 | 0.0000 |
| chr4_116566473_116573029_- | Exoc6b | -47.7396 | 0.0103 | 0.1237 | 0.3404 | 0.0000 |
| chr4_118655073_118655210_- | not_annotated | -47.7396 | 0.0103 | 0.1237 | 0.3404 | 0.0000 |
| chr4_119853548_119863889_+ | Hmces | -47.7396 | 0.0103 | 0.1237 | 0.3404 | 0.0000 |
| chr4_122781720_122783563_+ | Hdac11 | -47.7396 | 0.0103 | 0.1237 | 0.3404 | 0.0000 |
| chr4_124288316_124298466_- | Prickle2 | -47.7396 | 0.0103 | 0.1237 | 0.3404 | 0.0000 |
| chr4_133858082_133912590_- | not_annotated | -47.7396 | 0.0103 | 0.1237 | 0.3404 | 0.0000 |
| chr4_133909050_133909588_- | not_annotated | -47.7396 | 0.0103 | 0.1237 | 0.3404 | 0.0000 |
| chr4_140449475_140470253_+ | Itpr1 | -47.7396 | 0.0103 | 0.1237 | 0.3404 | 0.0000 |
| chr4_152270524_152282197_- | Erc1 | -47.7396 | 0.0103 | 0.1237 | 0.3404 | 0.0000 |
| chr4_168920537_168922845_- | Hebp1 | -47.7396 | 0.0103 | 0.1237 | 0.3404 | 0.0000 |
| chr4_176059640_176063299_- | not_annotated | -47.7396 | 0.0103 | 0.1237 | 0.3404 | 0.0000 |
| chr4_181939150_181942755_+ | Ccdc91 | -47.7396 | 0.0103 | 0.1237 | 0.3404 | 0.0000 |
| chr4_182666925_182826795_- | not_annotated | -47.7396 | 0.0103 | 0.1237 | 0.3404 | 0.0000 |
| chr4_183340726_183344295_- | not_annotated | -47.7396 | 0.0103 | 0.1237 | 0.3404 | 0.0000 |
| chr4_22262466_22280995_- | Abcb1b | -47.7396 | 0.0103 | 0.1237 | 0.3404 | 0.0000 |
| chr4_27680559_27680818_- | not_annotated | -47.7396 | 0.0103 | 0.1237 | 0.3404 | 0.0000 |
| chr4_31566712_31568774_+ | Col1a2 | -47.7396 | 0.0103 | 0.1237 | 0.3404 | 0.0000 |
| chr4_38290555_38379458_+ | Phf14 | -47.7396 | 0.0103 | 0.1237 | 0.3404 | 0.0000 |
| chr4_56849264_56861681_- | Tnpo3 | -47.7396 | 0.0103 | 0.1237 | 0.3404 | 0.0000 |
| chr4_57034673_57036782_+ | Smo | -47.7396 | 0.0103 | 0.1237 | 0.3404 | 0.0000 |
| chr4_57387152_57391559_+ | Nrf1 | -47.7396 | 0.0103 | 0.1237 | 0.3404 | 0.0000 |
| chr4_57745693_57766558_+ | Klhdc10 | -47.7396 | 0.0103 | 0.1237 | 0.3404 | 0.0000 |
| chr4_66193731_66196285_+ | Ubn2 | -47.7396 | 0.0103 | 0.1237 | 0.3404 | 0.0000 |
| chr4_67399951_67407458_- | not_annotated | -47.7396 | 0.0103 | 0.1237 | 0.3404 | 0.0000 |
| chr4_87017858_87018775_- | Lsm5 | -47.7396 | 0.0103 | 0.1237 | 0.3404 | 0.0000 |
| chr4_89221788_89238445_- | Fam13a | -47.7396 | 0.0103 | 0.1237 | 0.3404 | 0.0000 |
| chr4_95933283_95940085_+ | Smarcad1 | -47.7396 | 0.0103 | 0.1237 | 0.3404 | 0.0000 |
| chr5_122580014_122627055_- | Wdr78 | -47.7396 | 0.0103 | 0.1237 | 0.3404 | 0.0000 |
| chr5_128959422_129007397_+ | Eps15 | -47.7396 | 0.0103 | 0.1237 | 0.3404 | 0.0000 |
| chr5_135007881_135009794_+ | Pomgnt1 | -47.7396 | 0.0103 | 0.1237 | 0.3404 | 0.0000 |
| chr5_135447272_135471564_- | Nasp | -47.7396 | 0.0103 | 0.1237 | 0.3404 | 0.0000 |
| chr5_136420692_136510629_- | not_annotated | -47.7396 | 0.0103 | 0.1237 | 0.3404 | 0.0000 |
| chr5_140543793_140545728_+ | Ppt1 | -47.7396 | 0.0103 | 0.1237 | 0.3404 | 0.0000 |
| chr5_144459588_144465999_- | Ago1 | -47.7396 | 0.0103 | 0.1237 | 0.3404 | 0.0000 |
| chr5_144924321_144942704_- | Zmym4 | -47.7396 | 0.0103 | 0.1237 | 0.3404 | 0.0000 |
| chr5_148844953_148845254_+ | Pum1 | -47.7396 | 0.0103 | 0.1237 | 0.3404 | 0.0000 |
| chr5_151016809_151026871_- | Ppp1r8 | -47.7396 | 0.0103 | 0.1237 | 0.3404 | 0.0000 |
| chr5_154489598_154489939_+ | Id3 | -47.7396 | 0.0103 | 0.1237 | 0.3404 | 0.0000 |
| chr5_157894140_157899560_+ | Ubr4 | -47.7396 | 0.0103 | 0.1237 | 0.3404 | 0.0000 |
| chr5_159643630_159645469_- | Szrd1 | -47.7396 | 0.0103 | 0.1237 | 0.3404 | 0.0000 |
| chr5_164420987_164497312_- | not_annotated | -47.7396 | 0.0103 | 0.1237 | 0.3404 | 0.0000 |
| chr5_166001130_166042679_- | Kif1b | -47.7396 | 0.0103 | 0.1237 | 0.3404 | 0.0000 |
| chr5_172949060_172957859_+ | Gnb1 | -47.7396 | 0.0103 | 0.1237 | 0.3404 | 0.0000 |
| chr5_24452754_24460363_- | not_annotated | -47.7396 | 0.0103 | 0.1237 | 0.3404 | 0.0000 |
| chr5_28420098_28430782_+ | Tmem55a | -47.7396 | 0.0103 | 0.1237 | 0.3404 | 0.0000 |
| chr5_4469540_4503266_+ | not_annotated | -47.7396 | 0.0103 | 0.1237 | 0.3404 | 0.0000 |
| chr5_60601995_60617166_- | not_annotated | -47.7396 | 0.0103 | 0.1237 | 0.3404 | 0.0000 |
| chr5_63949359_63986963_- | Erp44 | -47.7396 | 0.0103 | 0.1237 | 0.3404 | 0.0000 |
| chr5_74285881_74286245_- | not_annotated | -47.7396 | 0.0103 | 0.1237 | 0.3404 | 0.0000 |
| chr5_8794167_8824029_- | Cspp1 | -47.7396 | 0.0103 | 0.1237 | 0.3404 | 0.0000 |
| chr5_93009057_93032294_- | not_annotated | -47.7396 | 0.0103 | 0.1237 | 0.3404 | 0.0000 |
| chr5_93024446_93055082_- | not_annotated | -47.7396 | 0.0103 | 0.1237 | 0.3404 | 0.0000 |
| chr6_104862169_104864961_+ | Smoc1 | -47.7396 | 0.0103 | 0.1237 | 0.3404 | 0.0000 |
| chr6_106068325_106097188_+ | Sipa1l1 | -47.7396 | 0.0103 | 0.1237 | 0.3404 | 0.0000 |
| chr6_108511842_108524653_- | Ltbp2 | -47.7396 | 0.0103 | 0.1237 | 0.3404 | 0.0000 |
| chr6_109744191_109778854_+ | not_annotated | -47.7396 | 0.0103 | 0.1237 | 0.3404 | 0.0000 |
| chr6_109764831_109800905_+ | not_annotated | -47.7396 | 0.0103 | 0.1237 | 0.3404 | 0.0000 |
| chr6_119791159_119833674_+ | not_annotated | -47.7396 | 0.0103 | 0.1237 | 0.3404 | 0.0000 |
| chr6_12314641_12323001_+ | Ppp1r21 | -47.7396 | 0.0103 | 0.1237 | 0.3404 | 0.0000 |
| chr6_124340622_124400951_- | Ttc7b | -47.7396 | 0.0103 | 0.1237 | 0.3404 | 0.0000 |
| chr6_129621583_129643821_+ | Papola | -47.7396 | 0.0103 | 0.1237 | 0.3404 | 0.0000 |
| chr6_129627825_129636485_+ | Papola | -47.7396 | 0.0103 | 0.1237 | 0.3404 | 0.0000 |
| chr6_135513651_135533476_+ | Rcor1 | -47.7396 | 0.0103 | 0.1237 | 0.3404 | 0.0000 |
| chr6_18880730_18884895_+ | Alkbh8 | -47.7396 | 0.0103 | 0.1237 | 0.3404 | 0.0000 |
| chr6_18884764_18900610_+ | Alkbh8 | -47.7396 | 0.0103 | 0.1237 | 0.3404 | 0.0000 |
| chr6_24394242_24459158_+ | not_annotated | -47.7396 | 0.0103 | 0.1237 | 0.3404 | 0.0000 |
| chr6_25838289_25892157_- | Bre | -47.7396 | 0.0103 | 0.1237 | 0.3404 | 0.0000 |
| chr6_33845664_33845900_+ | Pum2 | -47.7396 | 0.0103 | 0.1237 | 0.3404 | 0.0000 |
| chr6_41809177_41830656_- | Lpin1 | -47.7396 | 0.0103 | 0.1237 | 0.3404 | 0.0000 |
| chr6_4298605_4312324_- | Slc8a1 | -47.7396 | 0.0103 | 0.1237 | 0.3404 | 0.0000 |
| chr6_43254770_43300980_+ | not_annotated | -47.7396 | 0.0103 | 0.1237 | 0.3404 | 0.0000 |
| chr6_60133233_60142692_- | Ifrd1 | -47.7396 | 0.0103 | 0.1237 | 0.3404 | 0.0000 |
| chr6_76425366_76427075_- | Ralgapa1 | -47.7396 | 0.0103 | 0.1237 | 0.3404 | 0.0000 |
| chr6_76500538_76502628_- | Ralgapa1 | -47.7396 | 0.0103 | 0.1237 | 0.3404 | 0.0000 |
| chr6_76580256_76593494_- | Ralgapa1 | -47.7396 | 0.0103 | 0.1237 | 0.3404 | 0.0000 |
| chr6_7995166_8045059_- | Lrpprc | -47.7396 | 0.0103 | 0.1237 | 0.3404 | 0.0000 |
| chr6_8332013_8344901_- | Prepl | -47.7396 | 0.0103 | 0.1237 | 0.3404 | 0.0000 |
| chr6_86792193_86806641_+ | not_annotated | -47.7396 | 0.0103 | 0.1237 | 0.3404 | 0.0000 |
| chr6_9294518_9300870_- | not_annotated | -47.7396 | 0.0103 | 0.1237 | 0.3404 | 0.0000 |
| chr6_93582267_93588133_+ | not_annotated | -47.7396 | 0.0103 | 0.1237 | 0.3404 | 0.0000 |
| chr7_109055032_109057918_- | Zfat | -47.7396 | 0.0103 | 0.1237 | 0.3404 | 0.0000 |
| chr7_132922505_132925950_+ | Lrrk2 | -47.7396 | 0.0103 | 0.1237 | 0.3404 | 0.0000 |
| chr7_138090221_138090504_- | Slc38a2 | -47.7396 | 0.0103 | 0.1237 | 0.3404 | 0.0000 |
| chr7_141061863_141066723_+ | Tmbim6 | -47.7396 | 0.0103 | 0.1237 | 0.3404 | 0.0000 |
| chr7_141727863_141790342_+ | not_annotated | -47.7396 | 0.0103 | 0.1237 | 0.3404 | 0.0000 |
| chr7_25074370_25075413_+ | Nuak1 | -47.7396 | 0.0103 | 0.1237 | 0.3404 | 0.0000 |
| chr7_30410399_30418434_+ | Uhrf1bp1l | -47.7396 | 0.0103 | 0.1237 | 0.3404 | 0.0000 |
| chr7_60391033_60408823_- | Cpsf6 | -47.7396 | 0.0103 | 0.1237 | 0.3404 | 0.0000 |
| chr7_70580258_70584215_+ | Ddit3 | -47.7396 | 0.0103 | 0.1237 | 0.3404 | 0.0000 |
| chr7_70753100_70753299_+ | R3hdm2 | -47.7396 | 0.0103 | 0.1237 | 0.3404 | 0.0000 |
| chr7_70878208_70879165_- | Lrp1 | -47.7396 | 0.0103 | 0.1237 | 0.3404 | 0.0000 |
| chr7_73697828_73792160_- | Stk3 | -47.7396 | 0.0103 | 0.1237 | 0.3404 | 0.0000 |
| chr7_94726954_94737545_- | Taf2 | -47.7396 | 0.0103 | 0.1237 | 0.3404 | 0.0000 |
| chr7_98792746_98797649_- | not_annotated | -47.7396 | 0.0103 | 0.1237 | 0.3404 | 0.0000 |
| chr8_102350320_102351960_+ | Slc9a9 | -47.7396 | 0.0103 | 0.1237 | 0.3404 | 0.0000 |
| chr8_112752119_112772572_- | not_annotated | -47.7396 | 0.0103 | 0.1237 | 0.3404 | 0.0000 |
| chr8_116512146_116517254_- | Rbm5 | -47.7396 | 0.0103 | 0.1237 | 0.3404 | 0.0000 |
| chr8_117391270_117392964_- | Arih2 | -47.7396 | 0.0103 | 0.1237 | 0.3404 | 0.0000 |
| chr8_117398256_117402142_- | Arih2 | -47.7396 | 0.0103 | 0.1237 | 0.3404 | 0.0000 |
| chr8_122153878_122176014_+ | Clasp2 | -47.7396 | 0.0103 | 0.1237 | 0.3404 | 0.0000 |
| chr8_122210001_122216434_+ | Ubp1 | -47.7396 | 0.0103 | 0.1237 | 0.3404 | 0.0000 |
| chr8_22373420_22374897_+ | Slc44a2 | -47.7396 | 0.0103 | 0.1237 | 0.3404 | 0.0000 |
| chr8_26267388_26271172_- | Herpud2 | -47.7396 | 0.0103 | 0.1237 | 0.3404 | 0.0000 |
| chr8_33277813_33279218_+ | not_annotated | -47.7396 | 0.0103 | 0.1237 | 0.3404 | 0.0000 |
| chr8_33859473_33859733_+ | Ets1 | -47.7396 | 0.0103 | 0.1237 | 0.3404 | 0.0000 |
| chr8_40114846_40120265_- | Tbrg1 | -47.7396 | 0.0103 | 0.1237 | 0.3404 | 0.0000 |
| chr8_50264432_50274326_- | Pafah1b2 | -47.7396 | 0.0103 | 0.1237 | 0.3404 | 0.0000 |
| chr8_56585336_56592870_+ | Rdx | -47.7396 | 0.0103 | 0.1237 | 0.3404 | 0.0000 |
| chr8_56590638_56594983_+ | Rdx | -47.7396 | 0.0103 | 0.1237 | 0.3404 | 0.0000 |
| chr8_59724257_59740775_+ | not_annotated | -47.7396 | 0.0103 | 0.1237 | 0.3404 | 0.0000 |
| chr8_61133739_61141248_+ | Hmg20a | -47.7396 | 0.0103 | 0.1237 | 0.3404 | 0.0000 |
| chr8_64183983_64186247_- | Arih1 | -47.7396 | 0.0103 | 0.1237 | 0.3404 | 0.0000 |
| chr8_69091917_69099536_- | not_annotated | -47.7396 | 0.0103 | 0.1237 | 0.3404 | 0.0000 |
| chr8_70318276_70333132_+ | not_annotated | -47.7396 | 0.0103 | 0.1237 | 0.3404 | 0.0000 |
| chr8_75077445_75078242_+ | not_annotated | -47.7396 | 0.0103 | 0.1237 | 0.3404 | 0.0000 |
| chr8_77040307_77055209_- | not_annotated | -47.7396 | 0.0103 | 0.1237 | 0.3404 | 0.0000 |
| chr8_79096950_79105913_- | not_annotated | -47.7396 | 0.0103 | 0.1237 | 0.3404 | 0.0000 |
| chr8_85078543_85090192_+ | Gclc | -47.7396 | 0.0103 | 0.1237 | 0.3404 | 0.0000 |
| chr8_87503726_87531662_+ | Senp6 | -47.7396 | 0.0103 | 0.1237 | 0.3404 | 0.0000 |
| chr8_87521066_87542313_+ | Senp6 | -47.7396 | 0.0103 | 0.1237 | 0.3404 | 0.0000 |
| chr8_87537537_87550389_+ | Senp6 | -47.7396 | 0.0103 | 0.1237 | 0.3404 | 0.0000 |
| chr9_100576696_100588953_- | Hdlbp | -47.7396 | 0.0103 | 0.1237 | 0.3404 | 0.0000 |
| chr9_110795169_110798453_- | Fbxl17 | -47.7396 | 0.0103 | 0.1237 | 0.3404 | 0.0000 |
| chr9_112000529_112008383_- | Pja2 | -47.7396 | 0.0103 | 0.1237 | 0.3404 | 0.0000 |
| chr9_114989920_115018287_- | Ptprm | -47.7396 | 0.0103 | 0.1237 | 0.3404 | 0.0000 |
| chr9_116094503_116118654_- | Arhgap28 | -47.7396 | 0.0103 | 0.1237 | 0.3404 | 0.0000 |
| chr9_17200141_17203556_- | Gtpbp2 | -47.7396 | 0.0103 | 0.1237 | 0.3404 | 0.0000 |
| chr9_18439343_18441083_- | not_annotated | -47.7396 | 0.0103 | 0.1237 | 0.3404 | 0.0000 |
| chr9_20768097_20839897_+ | Cd2ap | -47.7396 | 0.0103 | 0.1237 | 0.3404 | 0.0000 |
| chr9_20826561_20856145_+ | Cd2ap | -47.7396 | 0.0103 | 0.1237 | 0.3404 | 0.0000 |
| chr9_28488673_28558845_- | Rims1 | -47.7396 | 0.0103 | 0.1237 | 0.3404 | 0.0000 |
| chr9_54258373_54258451_+ | Gls | -47.7396 | 0.0103 | 0.1237 | 0.3404 | 0.0000 |
| chr9_61674828_61675318_+ | Coq10b | -47.7396 | 0.0103 | 0.1237 | 0.3404 | 0.0000 |
| chr9_65301745_65302114_- | Clk1 | -47.7396 | 0.0103 | 0.1237 | 0.3404 | 0.0000 |
| chr9_67134925_67172784_+ | Cyp20a1 | -47.7396 | 0.0103 | 0.1237 | 0.3404 | 0.0000 |
| chr9_67298703_67341341_- | Raph1 | -47.7396 | 0.0103 | 0.1237 | 0.3404 | 0.0000 |
| chr9_67325453_67341341_- | Raph1 | -47.7396 | 0.0103 | 0.1237 | 0.3404 | 0.0000 |
| chr9_68628269_68642875_+ | not_annotated | -47.7396 | 0.0103 | 0.1237 | 0.3404 | 0.0000 |
| chr9_71926164_71927987_+ | not_annotated | -47.7396 | 0.0103 | 0.1237 | 0.3404 | 0.0000 |
| chr9_78912689_78929113_- | Fn1 | -47.7396 | 0.0103 | 0.1237 | 0.3404 | 0.0000 |
| chr9_78934205_78939729_- | Fn1 | -47.7396 | 0.0103 | 0.1237 | 0.3404 | 0.0000 |
| chr9_78934208_78939732_- | Fn1 | -47.7396 | 0.0103 | 0.1237 | 0.3404 | 0.0000 |
| chr9_79609560_79622587_- | Pecr | -47.7396 | 0.0103 | 0.1237 | 0.3404 | 0.0000 |
| chr9_81527521_81537291_+ | Arpc2 | -47.7396 | 0.0103 | 0.1237 | 0.3404 | 0.0000 |
| chr9_86056178_86069833_- | Cul3 | -47.7396 | 0.0103 | 0.1237 | 0.3404 | 0.0000 |
| chr9_88647464_88653711_+ | Agfg1 | -47.7396 | 0.0103 | 0.1237 | 0.3404 | 0.0000 |
| chr9_92644773_92658017_+ | Sp140 | -47.7396 | 0.0103 | 0.1237 | 0.3404 | 0.0000 |
| chr9_94504713_94508837_+ | not_annotated | -47.7396 | 0.0103 | 0.1237 | 0.3404 | 0.0000 |
| chrX_105506920_105507264_+ | not_annotated | -47.7396 | 0.0103 | 0.1237 | 0.3404 | 0.0000 |
| chrX_10582169_10613048_- | Usp9x | -47.7396 | 0.0103 | 0.1237 | 0.3404 | 0.0000 |
| chrX_124742590_124743712_- | Lamp2 | -47.7396 | 0.0103 | 0.1237 | 0.3404 | 0.0000 |
| chrX_2069758_2105553_- | Rp2 | -47.7396 | 0.0103 | 0.1237 | 0.3404 | 0.0000 |
| chrX_40522011_40553013_+ | Phex | -47.7396 | 0.0103 | 0.1237 | 0.3404 | 0.0000 |
| chrX_45715724_45732525_- | Prrg1 | -47.7396 | 0.0103 | 0.1237 | 0.3404 | 0.0000 |
| chrX_64889320_64893923_- | Zc4h2 | -47.7396 | 0.0103 | 0.1237 | 0.3404 | 0.0000 |
| chrX_65288199_65293237_+ | Msn | -47.7396 | 0.0103 | 0.1237 | 0.3404 | 0.0000 |
| chrX_74464424_74476516_- | RGD1564124 | -47.7396 | 0.0103 | 0.1237 | 0.3404 | 0.0000 |
| chr1_219398595_219399238_+ | Coro1b | -71.1094 | 0.0020 | 0.1237 | 0.5105 | 0.0000 |
| chr1_265682535_265698923_- | not_annotated | -71.1094 | 0.0020 | 0.1237 | 0.5105 | 0.0000 |
| chr10_14266619_14271341_- | Mapk8ip3 | -71.1094 | 0.0020 | 0.1237 | 0.5105 | 0.0000 |
| chr10_35875615_35876146_+ | Hnrnph1 | -71.1094 | 0.0020 | 0.1237 | 0.5105 | 0.0000 |
| chr10_40751167_40751896_- | Sparc | -71.1094 | 0.0020 | 0.1237 | 0.5105 | 0.0000 |
| chr12_6448960_6452158_+ | not_annotated | -71.1094 | 0.0020 | 0.1237 | 0.5105 | 0.0000 |
| chr12_9086408_9090699_+ | Flt1 | -71.1094 | 0.0020 | 0.1237 | 0.5105 | 0.0000 |
| chr14_106994181_107022586_- | Ehbp1 | -71.1094 | 0.0020 | 0.1237 | 0.5105 | 0.0000 |
| chr14_2595787_2597731_- | not_annotated | -71.1094 | 0.0020 | 0.1237 | 0.5105 | 0.0000 |
| chr14_44293703_44323368_- | Ube2k | -71.1094 | 0.0020 | 0.1237 | 0.5105 | 0.0000 |
| chr14_59708839_59709880_- | not_annotated | -71.1094 | 0.0020 | 0.1237 | 0.5105 | 0.0000 |
| chr15_28631170_28639464_- | Chd8 | -71.1094 | 0.0020 | 0.1237 | 0.5105 | 0.0000 |
| chr16_2289439_2298816_+ | Dennd6a | -71.1094 | 0.0020 | 0.1237 | 0.5105 | 0.0000 |
| chr17_83375370_83539887_+ | Plxdc2 | -71.1094 | 0.0020 | 0.1237 | 0.5105 | 0.0000 |
| chr18_3483762_3510293_- | not_annotated | -71.1094 | 0.0020 | 0.1237 | 0.5105 | 0.0000 |
| chr18_71698542_71829886_- | Ctif | -71.1094 | 0.0020 | 0.1237 | 0.5105 | 0.0000 |
| chr19_17493068_17494680_- | not_annotated | -71.1094 | 0.0020 | 0.1237 | 0.5105 | 0.0000 |
| chr19_815939_821572_+ | Cmtm4 | -71.1094 | 0.0020 | 0.1237 | 0.5105 | 0.0000 |
| chr2_152807002_152807924_- | Dhx36 | -71.1094 | 0.0020 | 0.1237 | 0.5105 | 0.0000 |
| chr2_197959397_197967061_- | Prpf3 | -71.1094 | 0.0020 | 0.1237 | 0.5105 | 0.0000 |
| chr2_27322285_27333634_- | Polk | -71.1094 | 0.0020 | 0.1237 | 0.5105 | 0.0000 |
| chr2_5335393_5418063_+ | Fam172a | -71.1094 | 0.0020 | 0.1237 | 0.5105 | 0.0000 |
| chr20_28106582_28107526_+ | not_annotated | -71.1094 | 0.0020 | 0.1237 | 0.5105 | 0.0000 |
| chr3_138050122_138051043_+ | Dstn | -71.1094 | 0.0020 | 0.1237 | 0.5105 | 0.0000 |
| chr3_33053496_33068624_- | Orc4 | -71.1094 | 0.0020 | 0.1237 | 0.5105 | 0.0000 |
| chr4_148230154_148258399_+ | Zfand4 | -71.1094 | 0.0020 | 0.1237 | 0.5105 | 0.0000 |
| chr5_107733214_107733570_+ | not_annotated | -71.1094 | 0.0020 | 0.1237 | 0.5105 | 0.0000 |
| chr5_152968943_152978059_- | Ldlrap1 | -71.1094 | 0.0020 | 0.1237 | 0.5105 | 0.0000 |
| chr5_155946582_155956607_+ | Usp48 | -71.1094 | 0.0020 | 0.1237 | 0.5105 | 0.0000 |
| chr5_19296052_19315576_+ | Ubxn2b | -71.1094 | 0.0020 | 0.1237 | 0.5105 | 0.0000 |
| chr6_104844490_104846483_+ | Smoc1 | -71.1094 | 0.0020 | 0.1237 | 0.5105 | 0.0000 |
| chr6_22266492_22270060_- | Spast | -71.1094 | 0.0020 | 0.1237 | 0.5105 | 0.0000 |
| chr6_22362488_22390548_+ | Memo1 | -71.1094 | 0.0020 | 0.1237 | 0.5105 | 0.0000 |
| chr6_9353460_9361359_- | not_annotated | -71.1094 | 0.0020 | 0.1237 | 0.5105 | 0.0000 |
| chr7_114487838_114529869_- | Ptk2 | -71.1094 | 0.0020 | 0.1237 | 0.5105 | 0.0000 |
| chr7_76852288_76853840_- | not_annotated | -71.1094 | 0.0020 | 0.1237 | 0.5105 | 0.0000 |
| chr8_22794901_22800798_- | Kank2 | -71.1094 | 0.0020 | 0.1237 | 0.5105 | 0.0000 |
| chr8_23302985_23308859_- | not_annotated | -71.1094 | 0.0020 | 0.1237 | 0.5105 | 0.0000 |
| chr9_11187797_11194343_- | Uxs1 | -71.1094 | 0.0020 | 0.1237 | 0.5105 | 0.0000 |
| chr9_113918918_113928459_+ | Wash1 | -71.1094 | 0.0020 | 0.1237 | 0.5105 | 0.0000 |
| chr9_63495768_63534661_- | Satb2 | -71.1094 | 0.0020 | 0.1237 | 0.5105 | 0.0000 |
| chr1_273714858_273721737_- | Xpnpep1 | -94.4792 | 0.0004 | 0.1237 | 0.6807 | 0.0000 |
| chr10_104600759_104602665_+ | not_annotated | -94.4792 | 0.0004 | 0.1237 | 0.6807 | 0.0000 |
| chr10_61979597_61983730_+ | Smg6 | -94.4792 | 0.0004 | 0.1237 | 0.6807 | 0.0000 |
| chr10_84725219_84727543_+ | Copz2 | -94.4792 | 0.0004 | 0.1237 | 0.6807 | 0.0000 |
| chr12_25442325_25455819_+ | Gtf2i | -94.4792 | 0.0004 | 0.1237 | 0.6807 | 0.0000 |
| chr3_81269794_81270191_+ | not_annotated | -94.4792 | 0.0004 | 0.1237 | 0.6807 | 0.0000 |
| chr6_22389165_22407626_+ | Memo1 | -94.4792 | 0.0004 | 0.1237 | 0.6807 | 0.0000 |
| chr7_31742496_31750455_- | Apaf1 | -94.4792 | 0.0004 | 0.1237 | 0.6807 | 0.0000 |
| chr8_62306190_62307577_+ | Cox5a | -94.4792 | 0.0004 | 0.1237 | 0.6807 | 0.0000 |
| chr10_18326421_18402658_- | Ranbp17 | -117.8491 | 0.0001 | 0.1088 | 0.8509 | 0.0000 |
| chr10_95396660_95398698_- | not_annotated | -117.8491 | 0.0001 | 0.1088 | 0.8509 | 0.0000 |
| chr2_189391378_189392862_- | Atp8b2 | -117.8491 | 0.0001 | 0.1088 | 0.8509 | 0.0000 |
| chr3_154526134_154533322_- | not_annotated | -117.8491 | 0.0001 | 0.1088 | 0.8509 | 0.0000 |
| chr7_70790920_70792642_+ | R3hdm2 | -117.8491 | 0.0001 | 0.1088 | 0.8509 | 0.0000 |
| chr1_154405931_154406882_+ | Picalm | -141.2189 | 0.0000 | 0.1067 | 1.0211 | 0.0000 |
| chr6_72429638_72430205_- | Strn3 | -141.2189 | 0.0000 | 0.1067 | 1.0211 | 0.0000 |
