# Supplementary material for: Circular RNA NF1-419 enhances autophagy to ameliorate senile dementia by binding Dynamin-1 and Adaptor protein 2 B1 in AD-like mice
Source: publisher site journal article supplement (doi:10.18632/aging.102529), 2019-12-20
Supplement: Supplementary file 2 [file aging-v11i24-102529-supplementary-material-SD4.doc]

### Table S4

**Table S4** Different expression of mRNA in SAMP8 and sscircNF-419-OV-AAV infected mice (*p* < 0.05 and more than 3 folds changes)

| **ID** | **SC_count** | **ss_count** | **SC_fpkm** | **ss_fpkm** | **log2(FC)** | ***p*-value** | **FDR** | **significant** |
| --- | --- | --- | --- | --- | --- | --- | --- | --- |
| ENSMUSG00000107478 | 0.0000 | 27.4900 | 0.0010 | 0.4300 | 8.4075 | 0.000171 | 0.002449 | up |
| XLOC_023553 | 4.9833 | 33.9133 | 0.0700 | 0.4800 | 8.3924 | 5.09E-13 | 6.61E-11 | up |
| ENSMUSG00000108815 | 0.6700 | 14.4833 | 0.2333 | 0.8800 | 7.3656 | 0.000195 | 0.002734 | up |
| ENSMUSG00000098650 | 19.1600 | 10.3633 | 0.5200 | 0.2900 | 7.0779 | 0.002669 | 0.022198 | up |
| ENSMUSG00000074210 | 13.4967 | 10.5900 | 0.6367 | 0.4767 | 7.0691 | 6.43E-05 | 0.001077 | up |
| ENSMUSG00000029248 | 1.6667 | 7.6667 | 0.1233 | 0.3800 | 6.1845 | 0.000141 | 0.00207 | up |
| ENSMUSG00000095195 | 0.0000 | 9.5367 | 0.0010 | 0.3833 | 6.0993 | 0.000208 | 0.002874 | up |
| ENSMUSG00000006204 | 1.3333 | 6.0000 | 0.0600 | 0.2000 | 5.8054 | 0.000791 | 0.008459 | up |
| ENSMUSG00000091228 | 1.4400 | 6.1467 | 0.1467 | 0.5933 | 5.8030 | 0.000877 | 0.009122 | up |
| XLOC_010825 | 1.0000 | 4.6667 | 0.0267 | 0.1267 | 5.7071 | 0.003694 | 0.02833 | up |
| ENSMUSG00000020429 | 0.3333 | 5.0000 | 0.0200 | 0.2700 | 5.5663 | 0.003579 | 0.027696 | up |
| XLOC_014647 | 2.6667 | 99.0000 | 0.1267 | 4.0800 | 5.3675 | 0.000474 | 0.005626 | up |
| XLOC_003592 | 12.6667 | 67.6667 | 0.2200 | 1.1867 | 5.0095 | 2.42E-13 | 3.42E-11 | up |
| ENSMUSG00000041534 | 1.3333 | 23.0000 | 0.0133 | 0.3133 | 4.5783 | 0.004217 | 0.031462 | up |
| XLOC_005633 | 1.3333 | 8.6667 | 0.0967 | 0.6333 | 4.3665 | 0.000237 | 0.003179 | up |
| ENSMUSG00000033726 | 3.0000 | 36.6667 | 0.1467 | 2.0767 | 3.9108 | 0.005354 | 0.037805 | up |
| ENSMUSG00000033730 | 35.0000 | 364.0000 | 1.9833 | 22.3533 | 3.8274 | 0.000717 | 0.007838 | up |
| XLOC_009906 | 1.3333 | 5.3333 | 0.1533 | 0.5767 | 3.6412 | 0.004616 | 0.033636 | up |
| XLOC_022398 | 32.6667 | 93.6667 | 0.5467 | 1.5767 | 3.5962 | 5.33E-12 | 5.35E-10 | up |
| ENSMUSG00000070564 | 2.7200 | 26.2333 | 0.1333 | 1.4000 | 3.5551 | 0.000902 | 0.009319 | up |
| ENSMUSG00000090356 | 0.3333 | 5.0000 | 0.0200 | 0.3233 | 3.5505 | 0.006668 | 0.044506 | up |
| XLOC_014187 | 10.0000 | 38.6667 | 1.9033 | 6.8400 | 3.5277 | 1.46E-07 | 6.01E-06 | up |
| ENSMUSG00000035033 | 34.3333 | 300.6667 | 0.5733 | 5.8333 | 3.4318 | 0.006958 | 0.045902 | up |
| ENSMUSG00000027868 | 4.3333 | 23.3333 | 0.0867 | 1.5733 | 3.4048 | 0.000192 | 0.002699 | up |
| ENSMUSG00000049709 | 5.3333 | 16.3333 | 0.0800 | 0.2567 | 3.3218 | 2.80E-05 | 0.000532 | up |
| ENSMUSG00000038331 | 25.0000 | 179.0000 | 0.2767 | 2.2567 | 3.2731 | 0.000712 | 0.007801 | up |
| ENSMUSG00000044244 | 301.3333 | 810.3333 | 10.1867 | 27.6667 | 3.1853 | 3.96E-31 | 2.38E-27 | up |
| ENSMUSG00000071342 | 4.3333 | 11.6667 | 0.3200 | 0.8467 | 3.1576 | 0.000521 | 0.006062 | up |
| ENSMUSG00000025727 | 58.9433 | 212.9167 | 1.7067 | 6.2433 | 3.1496 | 1.12E-17 | 3.25E-15 | up |
| ENSMUSG00000053310 | 290.0000 | 1820.6670 | 15.9167 | 108.0100 | 3.0970 | 0.000835 | 0.008825 | up |
| XLOC_010705 | 2.6667 | 8.3333 | 0.1033 | 0.3167 | 3.0927 | 0.005576 | 0.038947 | up |
| ENSMUSG00000031382 | 2.3333 | 8.6667 | 0.1333 | 0.5000 | 3.0885 | 0.004946 | 0.035466 | up |
| XLOC_018530 | 5.0000 | 14.3333 | 0.1433 | 0.4100 | 3.0651 | 0.001871 | 0.016792 | up |
| ENSMUSG00000036492 | 18.0000 | 65.6667 | 1.0367 | 3.6800 | 3.0130 | 2.81E-08 | 1.38E-06 | up |
| ENSMUSG00000025081 | 8.6667 | 0.6667 | 0.1167 | 0.0067 | -3.0208 | 0.00367 | 0.02822 | down |
| ENSMUSG00000031340 | 80.3333 | 24.6667 | 1.2533 | 0.4000 | -3.0224 | 2.15E-07 | 8.33E-06 | down |
| ENSMUSG00000033053 | 7.3333 | 1.0000 | 0.8433 | 0.1233 | -3.0918 | 0.002226 | 0.019301 | down |
| ENSMUSG00000023064 | 746.3333 | 145.0000 | 89.3433 | 17.5267 | -3.1108 | 2.60E-12 | 2.86E-10 | down |
| ENSMUSG00000025094 | 464.0000 | 167.6667 | 8.1900 | 3.1467 | -3.1168 | 2.13E-13 | 3.06E-11 | down |
| ENSMUSG00000102422 | 59.6133 | 24.6867 | 1.8033 | 0.7833 | -3.1189 | 1.62E-08 | 8.53E-07 | down |
| ENSMUSG00000000889 | 103.6667 | 43.3333 | 2.8800 | 1.2600 | -3.1226 | 0.000207 | 0.00287 | down |
| ENSMUSG00000048070 | 38.3333 | 5.3333 | 0.6167 | 0.0900 | -3.1304 | 5.12E-07 | 1.77E-05 | down |
| ENSMUSG00000026650 | 8.0000 | 2.6667 | 1.8800 | 0.6233 | -3.1633 | 0.001156 | 0.011365 | down |
| ENSMUSG00000049796 | 247.6667 | 36.6667 | 15.5400 | 2.4200 | -3.1662 | 2.16E-08 | 1.11E-06 | down |
| ENSMUSG00000035187 | 102.6667 | 22.6667 | 2.2567 | 0.5200 | -3.1871 | 5.34E-08 | 2.42E-06 | down |
| ENSMUSG00000094151 | 10.3333 | 1.6667 | 0.4467 | 0.0767 | -3.2178 | 0.002844 | 0.023255 | down |
| ENSMUSG00000059089 | 8.6667 | 3.0000 | 0.5800 | 0.2100 | -3.2231 | 0.000665 | 0.007384 | down |
| ENSMUSG00000020182 | 448.6667 | 110.6667 | 18.6100 | 4.8233 | -3.2239 | 7.08E-13 | 8.82E-11 | down |
| ENSMUSG00000089929 | 13.3333 | 3.3533 | 1.7133 | 0.4333 | -3.2564 | 0.000205 | 0.002849 | down |
| ENSMUSG00000022860 | 110.0000 | 26.6667 | 3.2433 | 0.7900 | -3.2724 | 1.31E-08 | 7.10E-07 | down |
| ENSMUSG00000021879 | 11.3333 | 2.6667 | 0.2867 | 0.0400 | -3.2867 | 0.000573 | 0.006526 | down |
| ENSMUSG00000067261 | 26.6667 | 6.3333 | 0.8267 | 0.2033 | -3.3083 | 5.82E-06 | 0.000137 | down |
| ENSMUSG00000097239 | 29.5100 | 9.8667 | 1.1700 | 0.4100 | -3.3106 | 2.51E-05 | 0.000485 | down |
| XLOC_000970 | 20.3333 | 8.3333 | 0.2767 | 0.1200 | -3.3201 | 9.45E-06 | 0.000208 | down |
| ENSMUSG00000068129 | 50.6667 | 13.0000 | 4.8867 | 1.2633 | -3.3474 | 9.28E-08 | 4.02E-06 | down |
| ENSMUSG00000056380 | 14.6667 | 3.3333 | 0.3767 | 0.0800 | -3.3653 | 7.65E-05 | 0.001248 | down |
| ENSMUSG00000017309 | 6.3333 | 2.0000 | 0.1933 | 0.0633 | -3.3755 | 0.007491 | 0.048374 | down |
| ENSMUSG00000050100 | 5.6667 | 1.3333 | 0.2400 | 0.0533 | -3.3755 | 0.007498 | 0.048374 | down |
| ENSMUSG00000021919 | 300.0000 | 35.6667 | 7.5300 | 0.9200 | -3.4103 | 0.000313 | 0.003973 | down |
| ENSMUSG00000072675 | 13.2000 | 0.9433 | 0.4167 | 0.0333 | -3.4146 | 0.004732 | 0.03426 | down |
| ENSMUSG00000063683 | 16.3333 | 2.0000 | 0.9333 | 0.1667 | -3.4496 | 2.72E-05 | 0.000519 | down |
| ENSMUSG00000042353 | 41.0000 | 4.6667 | 0.4200 | 0.0467 | -3.4770 | 3.10E-07 | 1.14E-05 | down |
| ENSMUSG00000047986 | 68.6667 | 10.6667 | 2.6067 | 0.3233 | -3.4845 | 1.48E-10 | 1.17E-08 | down |
| XLOC_004070 | 12.3333 | 1.0000 | 0.9467 | 0.0767 | -3.5558 | 0.00015 | 0.002183 | down |
| ENSMUSG00000027202 | 6.0000 | 1.3333 | 0.0867 | 0.0233 | -3.5592 | 0.003187 | 0.025491 | down |
| ENSMUSG00000030359 | 7.3333 | 1.0000 | 0.7933 | 0.0133 | -3.5614 | 0.004376 | 0.032344 | down |
| XLOC_001024 | 5.3333 | 1.0000 | 0.3533 | 0.0700 | -3.5622 | 0.003579 | 0.027696 | down |
| ENSMUSG00000029380 | 45.3333 | 6.0000 | 3.9033 | 0.5133 | -3.6287 | 8.65E-05 | 0.001384 | down |
| ENSMUSG00000044034 | 8.0000 | 1.0000 | 2.6333 | 0.2933 | -3.6474 | 0.002249 | 0.019427 | down |
| ENSMUSG00000099974 | 9.8800 | 2.3133 | 1.1833 | 0.2767 | -3.6487 | 0.002193 | 0.019063 | down |
| ENSMUSG00000040148 | 11.6667 | 1.3333 | 0.6400 | 0.0733 | -3.6538 | 5.45E-05 | 0.000932 | down |
| ENSMUSG00000100241 | 393.3333 | 43.3333 | 11.7600 | 1.3333 | -3.6628 | 0.000124 | 0.001853 | down |
| ENSMUSG00000023945 | 828.3333 | 96.0000 | 10.6533 | 1.2767 | -3.6641 | 0.000871 | 0.009075 | down |
| XLOC_005704 | 20.3333 | 4.6667 | 0.8033 | 0.1900 | -3.6821 | 2.76E-06 | 7.23E-05 | down |
| ENSMUSG00000020660 | 58.6667 | 5.3333 | 5.2433 | 0.5067 | -3.7549 | 2.80E-06 | 7.31E-05 | down |
| ENSMUSG00000021685 | 125.6667 | 60.0000 | 3.5733 | 2.0400 | -3.7702 | 1.27E-05 | 0.000269 | down |
| ENSMUSG00000050534 | 164.3333 | 12.0000 | 6.3433 | 0.4900 | -3.8002 | 1.62E-14 | 2.75E-12 | down |
| ENSMUSG00000054667 | 142.3333 | 36.6667 | 1.4700 | 0.4033 | -3.8029 | 1.46E-13 | 2.16E-11 | down |
| ENSMUSG00000072905 | 7.2367 | 1.0100 | 0.3067 | 0.0433 | -3.8038 | 0.003 | 0.024303 | down |
| ENSMUSG00000043003 | 9.3333 | 1.0000 | 0.1200 | 0.0133 | -3.8054 | 0.001446 | 0.013609 | down |
| ENSMUSG00000036962 | 7.6667 | 1.0000 | 0.3700 | 0.0267 | -3.9508 | 0.000387 | 0.004765 | down |
| ENSMUSG00000023484 | 558.6667 | 64.0000 | 24.1567 | 2.8567 | -3.9975 | 3.82E-18 | 1.21E-15 | down |
| ENSMUSG00000006546 | 8.3333 | 2.0000 | 1.2667 | 0.2867 | -4.0096 | 0.000508 | 0.005948 | down |
| ENSMUSG00000045518 | 22.6667 | 6.6667 | 0.3167 | 0.0967 | -4.0176 | 2.58E-07 | 9.67E-06 | down |
| ENSMUSG00000026358 | 17.3333 | 5.3333 | 0.9800 | 0.2867 | -4.0552 | 5.05E-06 | 0.000121 | down |
| ENSMUSG00000073530 | 86.3333 | 34.6667 | 0.7000 | 0.2467 | -4.0579 | 1.11E-08 | 6.17E-07 | down |
| ENSMUSG00000021604 | 22.3333 | 7.3333 | 0.6233 | 0.2100 | -4.0654 | 5.08E-07 | 1.76E-05 | down |
| ENSMUSG00000028072 | 104.6667 | 13.6667 | 2.8700 | 0.3933 | -4.1017 | 1.00E-15 | 2.06E-13 | down |
| ENSMUSG00000029219 | 290.0300 | 46.3333 | 10.1033 | 1.6833 | -4.1105 | 3.70E-12 | 3.89E-10 | down |
| ENSMUSG00000005892 | 228.0000 | 11.6667 | 13.5167 | 0.7000 | -4.1555 | 7.50E-13 | 9.27E-11 | down |
| ENSMUSG00000055197 | 29.0000 | 5.6667 | 2.3100 | 0.5833 | -4.3211 | 1.99E-08 | 1.03E-06 | down |
| XLOC_016201 | 10.0000 | 0.6667 | 1.0533 | 0.0733 | -4.3592 | 3.74E-05 | 0.000681 | down |
| ENSMUSG00000012520 | 131.3333 | 19.3333 | 3.0567 | 0.4933 | -4.4352 | 6.63E-13 | 8.43E-11 | down |
| XLOC_012761 | 14.3333 | 3.6667 | 0.3733 | 0.1000 | -4.6370 | 5.96E-06 | 0.00014 | down |
| ENSMUSG00000055368 | 55.3333 | 34.3333 | 0.5833 | 0.3900 | -4.7098 | 1.82E-07 | 7.30E-06 | down |
| ENSMUSG00000108367 | 13.3333 | 2.6667 | 0.9900 | 0.2100 | -4.7566 | 6.91E-06 | 0.000159 | down |
| ENSMUSG00000038115 | 98.3333 | 2.6667 | 1.7600 | 0.0533 | -4.7678 | 5.16E-15 | 9.41E-13 | down |
| ENSMUSG00000056569 | 23.3333 | 17.0000 | 1.1900 | 0.8800 | -4.7774 | 0.00039 | 0.004783 | down |
| ENSMUSG00000042258 | 19.3333 | 1.6667 | 0.7567 | 0.1800 | -4.7973 | 1.03E-06 | 3.25E-05 | down |
| ENSMUSG00000020679 | 4.0000 | 0.0000 | 0.1200 | 0.0010 | -5.2839 | 0.005791 | 0.040096 | down |
| ENSMUSG00000006143 | 5.0000 | 3.3333 | 0.6933 | 0.6067 | -5.4197 | 0.003802 | 0.028965 | down |
| ENSMUSG00000066363 | 4.7233 | 0.5967 | 0.1733 | 0.0233 | -5.4212 | 0.004756 | 0.034375 | down |
| ENSMUSG00000056829 | 4.6667 | 3.0000 | 0.2433 | 0.1633 | -5.5418 | 0.003432 | 0.026821 | down |
| ENSMUSG00000006764 | 431.6667 | 126.6667 | 11.4900 | 3.5933 | -5.5473 | 4.85E-28 | 1.09E-24 | down |
| ENSMUSG00000079323 | 4.6633 | 0.9067 | 0.2600 | 0.1000 | -5.6524 | 0.002255 | 0.019437 | down |
| ENSMUSG00000035451 | 4.6667 | 4.0000 | 0.0967 | 0.0900 | -5.7521 | 0.004322 | 0.032057 | down |
| ENSMUSG00000061815 | 4.6667 | 0.6667 | 0.1600 | 0.0300 | -5.7540 | 0.002721 | 0.022498 | down |
| ENSMUSG00000109660 | 4.7667 | 0.0000 | 0.4433 | 0.0010 | -5.7608 | 0.001535 | 0.014355 | down |
| ENSMUSG00000051940 | 6.2067 | 0.8533 | 0.1433 | 0.0200 | -5.8528 | 0.001407 | 0.013314 | down |
| XLOC_012148 | 5.6667 | 2.0000 | 1.6567 | 0.5667 | -5.8528 | 0.001406 | 0.013314 | down |
| ENSMUSG00000063935 | 5.6667 | 1.0000 | 0.2700 | 0.0400 | -5.8551 | 0.000861 | 0.008996 | down |
| ENSMUSG00000017311 | 5.6667 | 0.0000 | 3.8833 | 0.0010 | -5.8570 | 0.00079 | 0.008454 | down |
| ENSMUSG00000027233 | 7.3333 | 0.3333 | 0.2167 | 0.0100 | -6.0376 | 0.000592 | 0.006708 | down |
| ENSMUSG00000030228 | 8.5233 | 0.0000 | 0.1767 | 0.0010 | -6.2669 | 9.98E-05 | 0.001566 | down |
| ENSMUSG00000021609 | 255.0000 | 59.0000 | 4.8933 | 1.2300 | -6.5576 | 4.18E-05 | 0.000743 | down |
| ENSMUSG00000001076 | 10.6667 | 3.0000 | 1.2167 | 0.3500 | -6.6367 | 1.33E-05 | 0.000279 | down |
| ENSMUSG00000020838 | 299.0000 | 62.6667 | 7.6367 | 1.7167 | -6.7046 | 1.08E-28 | 2.77E-25 | down |
| XLOC_007281 | 14.0000 | 0.0000 | 0.2400 | 0.0010 | -7.1845 | 2.07E-07 | 8.06E-06 | down |
| ENSMUSG00000061259 | 19.3333 | 9.3333 | 0.5133 | 0.2567 | -7.2516 | 5.80E-07 | 1.95E-05 | down |
| ENSMUSG00000100916 | 20.0000 | 0.0000 | 3.4367 | 0.0010 | -7.8243 | 0.000275 | 0.003595 | down |
| ENSMUSG00000028298 | 143.3333 | 0.3333 | 24.0167 | 0.0600 | -8.2619 | 1.75E-06 | 4.98E-05 | down |
| ENSMUSG00000020713 | 988.3333 | 12.3333 | 111.5600 | 1.4833 | -8.4822 | 3.70E-12 | 3.89E-10 | down |
| XLOC_024157 | 42.6833 | 0.0000 | 0.5667 | 0.0010 | -8.5710 | 1.14E-14 | 1.99E-12 | down |
| ENSMUSG00000027120 | 39.6667 | 0.0000 | 1.8733 | 0.0010 | -8.8081 | 0.00015 | 0.002183 | down |
| ENSMUSG00000021342 | 468.3333 | 17.3333 | 50.5367 | 1.9933 | -9.1094 | 6.34E-11 | 5.38E-09 | down |
| ENSMUSG00000092329 | 271.3667 | 0.073333 | 4.67 | 0.001 | -11.0653 | 2.61E-40 | 4.71E-36 | down |
